# Supplementary material for: The Spatial Extent of Hydrological and Landscape Changes across the Mountains andPrairies of Canada in the Mackenzie and Nelson River Basins Based on Data from aWarm Season Time Window
Source: Copernicus journal article supplement (doi:10.5194/hess-2020-613), 2021-01-04
Supplement: Supplementary file [file hess-2020-613-RC1-supplement.pdf]

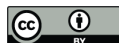

**The Spatial Extent of Hydrological and Landscape Changes across the Mountains and Prairies of Canada in the Mackenzie and Nelson River Basins Based on Data from a Warm Season Time Window**

5 Paul H. Whitfield<sup>1,2,3</sup>, Philip D.A. Kraaijenbrink<sup>4</sup>, Kevin R. Shook<sup>1</sup>, John W. Pomeroy<sup>1</sup>

<sup>1</sup>Centre for Hydrology, University of Saskatchewan, Saskatoon, SK, S7N 1K2, Canada

<sup>2</sup>Department of Earth Sciences, Simon Fraser University, Burnaby, BC

<sup>3</sup>Environment and Climate Change Canada, Vancouver, BC

<sup>4</sup>Geosciences, Utrecht University, Utrecht, The Netherlands

10 *Correspondence to:* Paul Whitfield ([paul.h.whitfield@gmail.com](mailto:paul.h.whitfield@gmail.com))

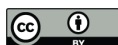

## Abstract

The cold interior of Western Canada, east of the Continental Divide, has one of the world's most extreme and variable climates and is experiencing rapid environmental change. In the large Mackenzie and Nelson River basins, the warming climate is changing the landscape, vegetation, cryosphere, and hydrology. This is a study of a large number (395) of natural (unmanaged) gauged basins where streamflow may be continuous or temporary, and observed streamflow records had been collected either year-round or during only the warm season. Each station may have records for a different series of years between 1910 and 2012. Instead of a common period of years and a small number of stations, as in many trend studies, an annual warm season time window where observations were available across all stations is used to classify [1] streamflow regime using dynamic time-warping, and [2] seasonal trend patterns with k-means clustering. The trends in seasonal streamflow patterns were compared to changes in satellite Normalized Difference Vegetation, Water, and Snow Indices (NDVI, NDWI, and NDSI) for each gauged basin using Landsat 5 TM imagery between 1985 and 2010.

Twelve streamflow regime types were identified using dynamic time-warping which overcomes timing differences in streamflow generation due to latitude or elevation. These streamflow regime types exhibit a strong connection to location; the spatial distribution follows ecozones and shows a strong distinction between mountains and plains in the study area. Clustering of seasonal trends using the annual common time window resulted in six trend patterns that also have a strong and distinct spatial organization. The trend patterns include one with decreasing streamflow, four with different patterns of increasing streamflow, and one with stations without trend structure. Trends in the mean, minimum, and maximum of three satellite indices were determined; the spatial patterns of trends in NDWI and NDSI were similar to each other, but different from NDVI trends. Streamflow regime types, the trend patterns, and satellite indices trends each showed spatially coherent patterns reflecting the influence of sources in the Canadian Rockies and other range in the west and poorly defined drainage basins due to post-glacial topography in the east and north. The overlap between hydrological and satellite index trends were not consistent across the study area. Three particular areas of change were identified: [i] in the mountains or lake-dominated, cold taiga-covered subarctic, north of 60°N, streamflow and greenness were increasing while wetness and snowcover were decreasing, [ii] in the forested Boreal Plains, particularly in the mountain west, streamflows

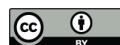

and greenness were decreasing but wetness and snowcover were not changing, and [iii] in the semi-arid to sub-humid agricultural Prairies three patterns of increasing streamflow and an  
 45 increase in the wetness index were observed. The largest changes in streamflow occurred in the eastern Canadian Prairies, where there were only a few increases in greenness and snow indices.

50

## 1. Introduction

Western Canada, east of the Continental Divide, has extreme and variable climates and is experiencing rapid environmental change (DeBeer *et al.* 2016) where a changing climate is  
 55 affecting the landscape, the vegetation, and the water. The southern part of this region sustains 80% of Canada's agricultural production, a large portion of its forest wood, pulp and paper production, and also includes several globally-important natural resources (e.g. uranium, potash, coal, petroleum). Understanding both observed changes and possible future changes is clearly in the national interest. Climate variation and change have been demonstrated to have  
 60 important effects on the rivers of Canada (Whitfield & Cannon 2000; Zhang *et al.* 2001; Whitfield *et al.* 2002; Janowicz 2008; Déry *et al.* 2009a, 2009b; Tan & Gan 2015) including Western Canada's cold interior (Luckman 1990, Burn 1994; Luckman & Kavanaugh 2000; Ireson *et al.* 2015; Dumanski *et al.* 2015; Ehsanzadeh *et al.* 2016). The sensitivity of streamflow to changes in temperature and precipitation may differ by period of the year (Leith  
 65 & Whitfield 1998; Whitfield and Cannon 2000; Botter *et al.* 2013). Trends in water storage, based on Gravity Recovery and Climate Experiment (GRACE) satellites, identified precipitation increases in northern Canada, a progression from a dry to a wet period in the eastern Prairies/Great Plains, and an area of surface water drying in the eastern boreal forest (Rodell *et al.* 2018). The Mackenzie and Nelson (Saskatchewan and Assiniboine-Red) River  
 70 Basins were the focus of this study and are where cold region climatic, hydrological, ecological,



hydrological, and cryospheric processes are highly susceptible to the effects of warming. Both rivers arise in the Canadian Rockies and receive the vast majority of their runoff from high-elevation headwater basins that are dominated by heavy snowfall, long-lasting seasonal snowcover, glaciers, and icefields. The whole region is subject to strong seasonality, continental climate, near absence of winter rainfall, seasonally frozen soils and from the mid-boreal forest northwards and at high elevations the sub-surface below an annually thawed active layer are permanently frozen (permafrost). Tens of millions of lakes and wetlands dominate the northern and eastern part of this region where the Canadian Shield dominates topography and hydrography. Cold winters and coincidence of the precipitation maximum with the snowmelt or postmelt period mean that rivers and streams have minimum flows in late winter and maximum flows in late spring. This study provides a statistical assessment of patterns and recent changes in the warm season hydrological regime, and in satellite indices of vegetation, water storage, and snow, and of the spatial patterns of these changes at gauged basins across this large domain.

Hydrological processes differ widely in this domain, which spans 11 of Canada's 15 terrestrial ecozones, and includes many small basins where streamflow is only temporary (Buttle *et al.* 2012). The hydrographs of all rivers in this domain reflect contributions from snowmelt, the magnitude of which differ in both space and time. There are important regional differences in how snowmelt contributes to the seasonal pattern of hydrographs. Other flow contributions, from glaciers and rainfall, all vary spatially across the domain with glacier contributions focussed in high mountain headwaters and rainfall contributions increasing at lower elevations and latitudes. Ecozones were chosen as an appropriate level for comparisons (Marshall *et al.* 1999; Eamer *et al.* 2014; Ireson *et al.* 2015) rather than physical attributes such as climate, permafrost, or geology, since ecozones represent regions where the ecology and physical environment operate as a system. It is important to note that many rivers in this study originate in one ecozone and cross through other ecozones maintain the characteristics of their source.

Streamflow data in this domain is taken from stations that were operated either year-round or seasonally (MacCulloch & Whitfield 2012); seasonal stations generally provide records from April through the end of October, because there is either no streamflow in the winter, or because the channels become completely frozen. This approach contrasts with many studies that use only stations having continuous records and a common period of years (e.g. Whitfield &

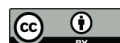

Cannon 2000); one novel aspect of this study is that it demonstrates a method which incorporates records from both continuous and seasonal stations. Trend assessment is conducted on an annual common time window for both continuous and temporary streams.

105 Landscape changes may cause or result from hydrological changes. Satellite imagery and derived spectral indices were used to assess the changes in the landscapes of basins in relation to their hydrological response. Normalized Difference Indices of vegetation, water, and snow (NDVI, NDWI and NDSI) were constructed using optical imagery from the Thematic Mapper (TM) sensor (USGS 1984) on board the Landsat 5 satellite for individual basins (e.g. Hall *et al.* 1995; Su 2000; Hansen *et al.* 2013; Pekel *et al.* 2016). Although the temporal coverage of  
 110 the indices differs from that of the hydrometric data, the trends in these indices over many basins provide another perspective of change over the study domain.

The objective of this study was to examine the hydrological structure and changes in seasonal streamflow patterns by combining data from perennial and temporary streams, which had  
 115 previously only been treated separately and individually, to diagnose hydrological structure and change in western Canada's cold interior. Linking continuous and seasonal data from a large number of hydrometric stations using only warm season data, three important questions were addressed in this study domain:

[1] how are the hydrological types and processes distributed?,

120 [2] how are climate related trends and mechanisms distributed?, and

[3] are some hydrological types, and processes more susceptible to change over time?

Examining trends in normalized difference indices for basins this study also addresses

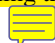

[4] whether there changes that may be driving or following the hydrological  
 125 change being observed?

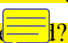

## 2. Methods



## 2.1 Data

130 The hydrometric (streamflow) stations selected for this study were all designated as ‘active’,  
 (i.e. were currently monitored), ‘natural’ (i.e. their flows are not managed), and either  
 continuous or seasonal and shown as having more than 30 years of data in ECDataExplorer  
 (Environment Canada 2010) at the time the data were downloaded. No attempts were made to  
 use a common window of years - rather all analyses used the entire period of record for each  
 135 station. In trend studies, time periods are selected that are a trade-off between record length  
 and network density (Hannaford *et al.* 2013). Many trend studies use a common period of years  
 with an arbitrary measure of completeness such as 20 years of data in a 60 year period (e.g.  
 Vincent *et al.* 2015) and rely on continuous data throughout the year so that measures such as  
 annual mean flow, or specific monthly flows, can be assessed for trend. This generally means  
 140 that only continuously observed sites would be included. The alternative approach used here  
 includes data from a large number of seasonal and continuously observed sites, which are  
 considered using only an annual time window described below.

The locations of the hydrometric stations, the main river basins, and major tributaries are shown  
 in Figure 1. Given the northerly (Mackenzie) or easterly direction of river flow in the region  
 145 the hydrometric stations generally sample basin hydrology that lies to the south or west of the  
 points shown. The number of continuous and seasonal stations in each of the larger river basins  
 is given in Table 1. Three additional stations were purposely included, these were at Changing  
 Cold Regions Network (CCRN) Water, Ecosystem, Cryosphere, and Climate (WECC)  
 observatories: Marmot Creek, Alberta; Smith Creek, Saskatchewan; and Scotty Creek,  
 150 Northwest Territories (Table 1), and including these stations provides a link to CCRN process-  
 based studies (DeBeer *et al.* 2016). Streamflow data from a total of 395 stations (gauged  
 basins) was available; 233 (59%) were operated on a seasonal basis. Water Survey of Canada  
 station numbers are here referred to as stationID. Basin areas range from 9.1 km<sup>2</sup> (Marmot  
 Creek) to 270000 km<sup>2</sup> (Liard River at the mouth) and station elevations range from 22 m  
 155 (Anderson River below Carnwath River) to 2095 m (Mistaya River near Saskatchewan  
 Crossing). The dataset contains nested basins. Individual stations were analysed for all periods  
 for which data were available, but clustering and statistical analysis involving multiple stations  
 were restricted to the data in the annual common time window of the year from 21 April to 1  
 November when both seasonal and continuous data sets were available. Plots of missingness  
 160 and annual station densities of the dataset are provided in Figure S1.



Figure 1 near here

Supplementary Figure S1

Table 1 near here

Satellite imagery and derived spectral indices are valuable for assessing effects of  
 165 environmental changes the hydrological responses of the gauged basins as these methods allow  
 determination of changes in vegetation, water bodies and snowcover for large areas (e.g. Hall  
*et al.* 1995; Hansen *et al.* 2013; Pekel *et al.* 2016; Su 2000). Time series of spectral remote  
 sensing indices were constructed using optical imagery from the Thematic Mapper (TM) sensor  
 (United States Geological Survey (USGS), 1984) on the Landsat 5 satellite for each gauged  
 170 basin. The satellite had a 16-day return period between 1985 and 2010 and acquired imagery  
 for any location on the Earth's surface with a spatial resolution of 30 m. The sensor was  
 selected for its spectral capabilities, which allowed evaluation of surface changes, and its long  
 operation which best suits the length of the hydrological record in the gauged basins. It was  
 chosen to avoid combining data from different satellites or sensors to maintain consistency in  
 175 spectral response over the study period. Later satellites use different spectral bands.

## 2.2 Analysis

All analyses were performed with R (R Development Core Team 2014); using packages  
 kendall (McLeod 2015), CSHShydRology (Anderson *et al.* 2018), and dtwclust  
 180 (Sarda-Espinosa 2017, 2018). Maps were plotted using maps and related packages. A  
 threshold of 0.05 was used in tests of significance, and 5% was also used as an indicator that  
 the number of trends exceeds the number expected by chance alone.

As the intention was to include data from as many stations as possible, the entire period of  
 record from each of the 395 gauged basins was used and only the window where data was  
 185 available from every station during the year, from 21 April to 1 November was analysed. Table  
 2 provides the starting dates of the five-day period corresponding to each 5-day period number  
 from April through November. Because the station periods of record were used, rather than a  
 common period of years, it was not appropriate to compare the magnitudes of trends among



the stations. Instead, the analyses were restricted to determining the existence of significant  
 190 trends in individual five-day periods from 21 April to 1 November (periods 23 to 61, Table 2).

The main panel in Figure 2 (bottom left) uses colour to show the magnitude of the flow for  
 each day of each year for the Bow River at Banff AB (stationID=05BB001), an example of a  
 long and complete continuous streamflow record from a national park in the Canadian Rockies.  
 This streamflow record was described in detail in Whitfield & Pomeroy (2016; 2017). The  
 195 upper panel of Figure 2 shows the minimum, median, and maximum values for each five-day  
 period and blue (red) arrows indicate periods where there are significant increasing  
 (decreasing) trends in streamflow over the period of record using Mann-Kendall tests. The  
 directions of significant trends (i.e. positive or negative) were determined and were used  
 subsequently for clustering of change types. The panel on the right shows the time series of  
 200 annual minimum, median, and maximum discharges. If there was a significant trend (Mann-  
 Kendall  $\tau$ ,  $p \leq 0.05$ ) the series was coloured (red for decreasing, blue for increasing); black for  
 no trend. The function for generating these plots was from CSHShydRology.

Many of the stations in this study were operated for differing periods of time and with differing  
 operating schedules. Figure 3 provides an example for the Bow River at Lake Louise, AB  
 205 (05BA001), a station upstream of the Bow River at Banff, showing that this station had  
 continuous operation between 1910 and 1920, was discontinued from 1921 until 1963, operated  
 continuously between 1964 and 1986, then had seasonal operation between 1987 and 2013 and  
 hence records only exist during the warm season (Figure 3). The seasonal trends shown in the  
 upper panel are based on all years in which data were present in the five-day periods. In the  
 210 right-hand panel, trends over time in annual minima, medians, and maxima are based only upon  
 the years with complete data and this shows gaps in the time series. Trends of these types  
 should be based only using years with complete record and are not addressed further since a  
 large proportion of the stations have seasonal operation. Figures S2-S13 show up to four  
 example hydrometric stations for each Streamflow Regime cluster, as described below. Many  
 215 of these plots show stations where the operation has alternated between being seasonal and  
 continuous similar to Figure 3. Figures S2-S13 also demonstrate the variation in the years of  
 record between stations. Clearly historical budgetary and management decisions in the  
 Canadian hydrometric program affect any current analysis of hydrological trends and change.

Figure 2 near here



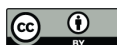

220 Figure 3 near here

### 2.2.1 Streamflow Regime Types

To avoid the effects of the areas of the gauged basins, the five-day streamflow records were converted to Z-scores, by subtracting the mean value and dividing by the standard deviation, of the series five-day medians. The resulting series have means of zero and unit variance; plots of these were scaled in magnitude by the standard deviations (e.g. Figure 4). Early snowmelt at low latitudes and elevations resulted in some stations having flow events prior to the annual common time window (Figure 4). Only the data in the periods between the two vertical dashed lines in Figure 4 (five-day periods 23 to 61) were used in the clustering (and subsequent trend analysis) reported here. The use of five-day means is based on previous work (Leith and Whitfield 1998, Déry *et al.* 2009) to place the analysis at a common time step across all site and to balance the variation in hydrologic signatures of basins of different size while avoiding information loss that occurs with smoothing at seasonal and monthly time steps (Whitfield 1998).

235

Figure 4 near here.

Statistical methods, such as k-means (Likas *et al.* 2003; Steinley 2006) or self-organized maps (Kohonen & Somervuo 1998; Hewitson & Crane 2002; Kalteh *et al.* 2008; Céréghino & Park 2009; van Hulle 2012), are unable to group hydrographs when they are not aligned in time (Halverson & Fleming 2015). Across the study domain this is a difficulty, as the timing of snow accumulation and melt are strongly affected by both latitude (48°N to 69°N) and elevation (near sea level to >2100m) reflecting the seasonal variation in the 0° isotherm (Mekis *et al.* 2020).

The clustering of annual median streamflow time series was done using dynamic time warping, DTW, (Berndt & Clifford 1994; Wang & Gasser 1997; Keogh & Ratanamahatana 2005) which measures similarity between time series that may vary in magnitude and timing by aligning the two standardized (zero mean, unit variance) curves in time, essentially matching the shape of inflections to create clusters (Sarda-Espinosa 2017; Whitfield *et al.* 2020).



As an example of the DTW alignment, the z-scores of the median streamflows from two  
 250 stations, the semi-arid foothills and grassland-sourced Snake Creek near Vulcan AB  
 (05AC030), and Arctic tundra-sourced Anderson River below Carnath River NT (10NC001)  
 are aligned in Figure 5. The two curves differ in the timing and magnitude of their peaks  
 (Figure 5a), the DTW distance calculated is a dissimilarity measure constructed from a warping  
 path based upon the matching of inflections between the two curves (Figure 5b) essentially  
 255 matching the shape of inflections and shifting the curves to a common time frame (Figure 5c).  
 The R package *dtwclust* (Sarda-Espinosa 2017) implements dynamic time warping to  
 cluster multiple curves based upon their having similar shapes and inflections and was used for  
 clustering the 395 cases in this study. The timing of inflections does not affect the clustering,  
 so the effects of latitude and elevation that often result in misclassification of hydrographs  
 260 because of timing differences are avoided. This is important given the size of the spatial  
 domain considered here. A twelve-cluster solution was chosen; this number of clusters  
 balances regional separation of similar Hydrograph Types while avoiding producing many  
 types with single stations which represent unique hydrological situations. “Streamflow Regime  
 Type” in the text which follows refers to these twelve clusters.

265 The centroids of each regime type provide insight to differences in regional hydrology. The  
 shape of the centroid and the recession slope(s) of the curves provide information that can be  
 used to further compare differences between clusters.

Figure 5 near here

## 270 2.2 Trend Patterns

Trends in the five-day periods for the annual common time window were determined for the  
 period of record of each time series, using Mann-Kendall tests as described above, following  
 the approach of Déry *et al.* (2009) for examining trend magnitude for a fixed endpoint in time.  
 Interpreting the results for any fixed time period may not be representative of a longer time  
 275 scale (Hannaford *et al.* 2013). As these were comparing periods separated by 360 days, i.e. a  
 resampled time series, autocorrelation was not expected and therefore pre-whitening was not  
 applied. Tests with 100+ years of record show that nearly 90% of cases did not show  
 autocorrelation, and the balance were close to the level of significance (0.19). The individual  
 station trend test results are indicated in the upper panel of Figures 2, 3, & S2-S13 where



280 significant increases and decreases are indicated by blue and red arrows respectively. The  
 significant increasing, no trend, and decreasing trends were assigned scores of 1, 0, and -1  
 respectively. The individual annual trend scores for the annual common time window for the  
 395 stations were clustered using the method of k-means, which partitions observations into  
 clusters having similar means and which is well suited to clustering of features such as patterns  
 285 of significant differences (Likas *et al.* 2003; Steinley 2006; Agarwal *et al.* 2016). The number  
 of clusters chosen (six) was based upon the elbow method (Ketchen & Shook 1996; Kodinariya  
 & Makwana 2013); using more than six clusters did not improve the modelling (not shown).  
 These six clusters are hence referred to as “Trend Patterns”.

Figures S2-S13

290 As the method used here is unconventional we assessed how the patterns of trends would differ  
 when using varying periods of record. Trends in each of 39 five-day periods were first  
 determined for the entire period of record and were then compared to those of 21 periods, with  
 lengths decreasing by five years between 1905 and 2005 (e.g. 1905-2015, 1910-2015, 1913-  
 2015, ...). Eleven stations having than three years of data in the final interval [2005-2015]  
 295 were excluded so that missing values were not introduced. The ~15000 comparisons (384 sites  
 for 39 five-day periods) were used to determine the number of cases where the trends did not  
 change. These comparisons were also tested using a classification approach and the adjusted  
 Rand Statistic (Morey & Agresti 1985) and produced similar results (not provided here).

### 300 2.3 Trends in Vegetation, Water, and Snow Satellite Indices

Given the large study region and the long study period, analyses of time series of Landsat 5  
 TM data are very resource intensive, both in terms of storage and computational power, and  
 are beyond the scope of desktop computing. Google Earth Engine (GEE) allows for cloud-  
 based planetary scale analysis while it serves as a database for petabytes of open access satellite  
 305 imagery such as the Landsat archive (Google Earth Engine Team 2017; Gorelick *et al.* 2017),  
 and is particularly capable for this study.

Using GEE, Landsat 5 TM image composites ( $n=579$ ) were produced to cover the spatial extent  
 of all the gauged basins for the period between 1985 and 2010 by mosaicking the available  
 image scenes for each consecutive 16-day period. Theoretically this would allow for spatially-

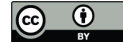

complete mosaics given the 16-day revisit time of the satellite. To determine accurate spectral indices at the basin-scale, pixels containing clouds or cloud shadows in each image scene were masked prior to mosaicking using the GEE-integrated Fmask algorithm (Zhu *et al.* 2015), which introduced intermittent data gaps to the set of mosaics. Additional data gaps were caused by occasional unavailability of satellite image scenes in the Landsat 5 TM catalogue, typically due to image quality or georeferencing issues (USGS and NOAA 1984). To reduce the computation cost and data volume, the final mosaics were generated at an aggregated spatial resolution of 300 m. The total number of satellite image scenes used was 83381.

For each basin, three time series of spectral index averages were derived from the 16-day mosaics of Landsat 5 TM data. Each normalized difference index (I) compares two wavelength ranges (W1 & W2) observed by the satellite detectors, using the form  $I = (W1 - W2) / (W1 + W2)$ , each index ranging between -1 and 1. The three common indices used were the Normalized Difference Vegetation Index (NDVI), Normalized Difference Water Index (NDWI) and Normalized Difference Snow Index (NDSI) (Lillesand *et al.* 2014), and were calculated by:

$$NDVI = (R_{NIR} - R_{Red}) / (R_{NIR} + R_{Red}), \quad (1)$$

$$NDWI = (R_{NIR} - R_{SWIR}) / (R_{NIR} + R_{SWIR}), \text{ and} \quad (2)$$

$$NDSI = (R_{Green} - R_{SWIR}) / (R_{Green} + R_{SWIR}), \quad (3)$$

where  $R$  is the dimensionless top-of-atmosphere reflectance, Green is TM band 2 (green light 0.52 – 0.60  $\mu\text{m}$ ), Red is TM band 3 (red light 0.63-0.69  $\mu\text{m}$ ), NIR is TM band 4 (near infrared 0.76 – 0.9  $\mu\text{m}$ ), and SWIR is TM band 5 (shortwave infrared 1.55 – 1.75  $\mu\text{m}$ ). Because of the presence of the masked cloud pixels and data gaps, the basin means were often only calculated from a fraction of the complete pixel set of the basin, this fraction was determined for every observed time step.

For each sixteen day period, the mean NDVI, NDWI, NDSI, and the fractional coverage were determined for each of 375 gauged basins for which a shapefile of basin boundaries was available (20 basin boundaries were not available from Water Survey of Canada). A sample dataset is shown in Figure S14. Time series of annual maximum, mean, and minimum were



determined for each of the normalized different indices and their fractional coverages from these datasets. Since there were only ~22 images (at most) available for each year in each basin, the entire year was used rather than the annual common time window so that the annual minimum, maximum, and mean would be comparable across the study domain.

340 Forkel *et al.* (2013) demonstrated the annual variability of in NDVI time series and the effects of using different analysis methodologies. Verbesselt *et al.* (2010, 2012) and de Jong *et al.* (2012) used breaks for additive season and trends (bfast) to detect change, particularly phenological change, in satellite imagery; bfast iteratively estimates the time and number of abrupt changes within time series derived from satellite images. While this methodology has  
 345 considerable appeal and has been used widely and successfully to assess change in target areas, it was impractical to apply bfast here as it is difficult to summarize multiple changes in seasonality, trends, and breakpoints for three indices across 375 basins. A simpler approach, testing for simple trends in the mean, maximum, and minimum indices, using Mann-Kendall (McLeod 2015) avoids the rich complexity possible with bfast, but still illustrates that NDVI,  
 350 NDWI, and NDSI changes were accompanying streamflow regime changes. The minimum NDSI values excluded zero values.

Figure S14

### 3. Results

#### 355 3.1 Streamflow Regime Types

The Streamflow Regime Types from the twelve-cluster solution are shown in Figure 6. Each of the twelve plots contains a line for each gauged basin in that Type and the heavy dashed line is the centroid of all members; the colour of the lines is based upon stationID. The x-axis is time, shown in increments of 5-day periods, these periods are renumbered starting with 1 for  
 360 period 23. The y-axis is the z-score (standard deviation units); the series for each site was converted to a z-score subtracting the mean and dividing by the standard deviation. The differences in the shapes of the hydrographs between Regime Types is evident and demonstrates how the shapes of the members and locations within a Streamflow Regime Type



were similar. The outlying individual cases (e.g. Streamflow Regime Types 6, 7, & 8) are also  
 365 evident.

Figure 6 near here

Example plots for each of these twelve Streamflow Regime Types are shown in Figures S2 to  
 S13 to illustrate the similarity and differences between the hydrographs of within the  
 Streamflow Regime Types. Streamflow Regime Type 1 basins were generally Rocky  
 370 Mountain basins that have strong snowmelt and spring rainfall maxima signals (Figure S2).  
 Streamflow Regime Type 2 basins were reflective of Prairie streams with spring snowmelt and  
 long periods with low or zero flow due to summer water deficits, variable contributing areas,  
 and frozen conditions in winter (Figure S3). Streamflow Regime Type 3 basins were in the  
 Athabasca River Basin dominated by humid upland boreal forest and lowland muskeg (Figure  
 375 S4). Streamflow Regime Type 4 (Figure S5) have both strong snowmelt and late summer  
 streamflow. Streamflow Regime Type 5 basins were predominately in the sub-humid Boreal  
 Plains mixed forest (Figure S6). Basins of Streamflow Regime Types 6-8 & 10 were unique  
 (or nearly so), but were similar to adjacent types (Figures S7, S8, S9, & S11). An interesting  
 feature of these four types is that peak flows occur at different times in different years.  
 380 Streamflow Regime Type 9 basins peak later in the summer, and were generally smoother than  
 for other basins (Figure S10). Streamflow Regime Type 11 basins have an early snowmelt  
 peak and high flows extending through into the fall (Figure S12). Streamflow Regime Type  
 12 basins have an early snowmelt peak and persistent high flows during summer and extends  
 into the fall (Figure S13).

385 The spatial extents of the twelve Streamflow Regime Types were mapped over ecozones in  
 Figure 7; there is a clear spatial organization, rather than a random pattern. This association is  
 also evident in Table 3. Two large-scale features are evident: similar types tend to be from the  
 same spatial areas, and some similar types follow along major rivers. Streamflow Regime  
 Types 3 & 11 follow along rivers and Types 2 & 5 overlap. Streamflow Regime Types 1 (104  
 390 members) & 5 (148) occur in the greatest numbers of ecozones (8 & 6 respectively; Table 3).

Figure 7 near here.



Streamflow Regime Type 1 basins occur in the Cordillera (Montane  $n=31$  basins, Boreal  $n=11$ , and Taiga  $n=1$ ) and also the Boreal Plains ( $n=31$ ), Taiga Plains ( $n=5$ ), Boreal Shield ( $n=13$ ) and Prairies ( $n=11$ ); the Type 1 hydrograph shows a sharp, brief melt period followed by a long, slow recession (Figure 6). Streamflow Regime Type 5 basins were also common in the Prairie ecozone ( $n=49$ ), in the Boreal Plains ( $n=81$ ) as well as along the Mackenzie River to below Great Slave Lake; this hydrograph shows an earlier and briefer peak than Type 1 with a rapid recession (Figure 6). Streamflow Regime Type 4 basins ( $n=10$ ) were predominantly found in the Montane Cordillera in the west ( $n=5$ ) and in the Boreal Shield and Boreal Plains in the east ( $n=2$  each); the hydrograph shows prolonged high flows during the melt period, and a short recession with relatively large flows (Figure 6). Streamflow Regime Type 3 basins ( $n=22$ ) appear in the Boreal Plains ( $n=17$ ), Boreal Shield ( $n=2$ ) and Prairies ( $n=3$ ) and demonstrates the persistence of a mountain runoff signal along the Athabasca River, as this hydrograph contains the late-melt signal from glaciers and high elevation snowpacks (Figure 6). Streamflow Regime Type 2 basins ( $n=85$ ) were associated with the Prairie ecozone ( $n=57$ ) and Boreal Plains ( $n=28$ ), but this pattern also occurs in the Southern Arctic ( $n=1$ ) and Taiga Plain ( $n=3$ ); this pattern has the earliest snowmelt and most rapid recession and the records often begin with snowmelt already in progress (Figure 6). Streamflow Regime Type 11 basins ( $n=12$ ) were located near the mouth of the Mackenzie in the Taiga Plains and in the Hudson Plains along the Nelson River in Manitoba. Streamflow Regime Type 12 basins ( $n=4$ ) were in the Boreal Cordillera. Streamflow Regime Types 6-8 basins (1 each) and 9 ( $n=2$ ) were located at the edges of ecozones. While these descriptions are explicit, there was overlapping of types in space (particularly Streamflow Regime Types 2 & 5), and cases where individual basins of a Type occur quite separately from each other (Types 9 & 12) as is evident in Figure 7).

Table 3 near here.

The standardized streamflows plotted in Figure 6 make it difficult to compare the Streamflow Regime Types; plotting the z-score centroids of each (Figure 8) makes the comparisons simpler. The non-prairie Streamflow Regime Types have approximately linear recessions with two slopes (Types 1, 3, 4, & 12) or more (Type 11). The slopes of the recessions are listed in Table 4. Typically, the first recession phase was steeper than the second phase - where there was one. In Streamflow Regime Type 11 the third phase was steeper than the second, but not as steep as the first. After a rapid recession, Streamflow Regime Type 2 becomes nearly



horizontal, probably due to Prairie streams typically having no base flows due to lack of groundwater contributions. In Streamflow Regime Type 5 the recession has two linear phases, and also terminates in a horizontal section, which was again likely to be caused by the absence of base flows in many Prairie basins. These recessions appear to have only five values, two that were steep (-0.22 and -0.16) and two that were much flatter (-0.06 and -0.04) in addition to the zero slope (no slope) of Type 5.

Figure 8 near here

Table 4 near here.

A caution is warranted here. The shapes of hydrographs are controlled by the climate, hydrological processes and landscape predominantly in the area of the basin where most of the runoff is generated, and while association with an ecozone was useful, the ecozone is a generalization and does not always capture hydrological functions in the source areas. In many rivers, the source of runoff lies in the high mountains and these patterns are transmitted along the downstream river course such as in the Mackenzie, Liard, Athabasca, and Nelson Rivers. Such stations are not independent. Differences between Streamflow Regime Type 1 & 4 basins likely reflect low late summer flows from parts of the Rocky Mountains. In areas where there was overlap between different Streamflow Regime Types, both similarities and differences exist between the basins.

### 3.2 Trend Patterns

Streamflow Regime trend patterns are based upon the statistical trends in five-day flows discussed above. Figure 9 illustrates the trend results for one station, 05DA007 Mistaya River near Saskatchewan Crossing which drains a heavily glaciated mountain basin that is undergoing deglaciation. In the case of Figure 9 there were three periods (39, 40, and 46) in July and August having significant decreases; the other periods have no trends.

Figure 9 near here





450 Figure 10 plots all significant trends for the 395 basins, with significant increase and decreases shown in blue and red, no trend in gray, and no available data in white. These data were ordered by the six Trend Patterns determined using only the data for the five-day periods from 23 to 61; Figure S15 shows the data order by stationID. The periods 1-22 and 62-73 were not included in the clustering, but were plotted as they are also of interest.

455 Figure 10 near here.

Figure S15

Trend Patterns in Figure 10 are presented in the order that clusters were formed, showing the distinctly different Trend Patterns 1, 2, 3, 4, & 6, while Trend Pattern 5, the largest group with more than 250 basins (64% of the total), does not have a consistent organized change despite there being individual periods with increasing or decreasing trends. Trend Pattern 1 shows positive streamflow trends in most of the annual common time window suggesting a general increase in wetness throughout the spring, summer, and fall. Trend Pattern 2 has positive trends suggesting increased wetness after period 30 in early summer. Trend Pattern 3 has predominantly significant negative trends, with many more in periods 40-61 than in periods 23-39 suggesting decreases in late summer and fall streamflow. Trend Pattern 4 has significant increases centred about period 35, suggesting a shift increased snowmelt and rainfall runoff peaks in June. Trend Pattern 6 shows significant increases in the first periods and last periods of the window but not during the summer; this group of stations all have winter data and show increasing streamflow throughout the late fall, winter, and early spring periods.

470 The trends presented in Figure 10 are based on 39 five-day periods using the available data set with records of at least 30 years. The stability of the trend results with decreasing-length observation periods is demonstrated in Figure 11 where the trends are compared for increasingly shorter time periods with the results for the entire period. The fraction of the approximately 15000 reduced-period results that are the same as the complete-period results, is greater than 0.75, even when the record length is reduced to 10 years. The mean fraction of sites showing significant trends detected in each time period is about 0.20, and is at a maximum at 35 years, and decreases at shorter time intervals (Figure11). For a period of 10 years, 5% of the cases show significant trends, as would be expected by chance alone. The impact of



reduced length affects the trend patterns differently. Trend Patterns 1 to 3 show greater changes  
 480 in the fraction of significant trends than Trend Patterns 4 to 6 (Figure 11).

Figure 11 near here

Associating a trend pattern with a Streamflow Regime type is complicated as there were  
 different numbers of basins in the Streamflow Regime Types and Trend Patterns (Table 5).  
 Trend Pattern 5, which lacks any pattern, was very prominent in most of the Streamflow  
 485 Regime types having many members. Again, the caution regarding rivers sourced in the  
 mountains and propagating the upstream signal downstream in nested watersheds also applies  
 to their trend pattern as well.

Table 5 near here.

The six Trend Patterns of the 395 hydrometric stations are mapped to ecozones in Figure 12.  
 490 Supplementary Figures S16-S21 provide more detail on the individual Trend Patterns and the  
 station locations. Trend Pattern 1 (n=19, S16) basins were located at the eastern and western  
 margins of the Prairies with two north of 60°, all showing increasing streamflows throughout  
 the entire year. Trend Pattern 2 (n=22, S17) basins, with early summer increases, were located  
 across the Prairies, and in the eastern portion of the Boreal Plain. Trend Pattern 3 (n=32, S18)  
 495 basins, showing decreased streamflow, were located predominantly in the western portions of  
 the Boreal Plain and in the eastern edge of the Montane Cordillera. Trend Pattern 4 (n=50,  
 S19) basins, with larger early summer peaks, were located across the Prairies largely along the  
 northern edge adjacent to the Boreal Plains and in a few northern locations in the Boreal Plain.  
 Trend Pattern 5 (n=254, S20) does not show an organized change pattern in the annual common  
 500 time window and were distributed across all ecozones. Trend Pattern 6 (n=18, S21) basins,  
 with higher cold and cool season flows, were located entirely in northern areas in the Taiga  
 Plains, Taiga Shield, and Taiga and Boreal Cordillera. Overall, 28% of the basins show one of  
 the four increasing trend patterns and 8% have the single decreasing pattern.

At the ecosystem scale, 51% of basins in the Prairies exhibit a definite Trend Pattern with 45%  
 505 showing one of the increasing patterns (Trend Patterns 1, 2, 4, & 6) and 6% the decreasing  
 Trend Pattern 3 (Table 6). In the Taiga, increasing Trend Patterns predominate with 46% of  
 stations in the Taiga Plains showing increasing patterns and none having the decreasing Trend



Pattern, 29% of the Taiga Shield having an increasing Trend Pattern and 14% a decreasing  
 Trend Pattern, and all three of the Taiga Cordillera basins having increasing Trend Patterns  
 510 (Table 6). The Boreal Shield and Plains have increasing Trends Patterns in 16% of stations,  
 and decreasing Trend Patterns in 13%. The Boreal and Montane Cordillera have increasing  
 Trend Patterns in 11% of basins and only the Montane Cordillera had the decreasing Trend  
 Pattern (5%) (Table 6). Trend Pattern 6 only occurs in the northern portion of the study area  
 which is dominated by thawing permafrost. None of the stations on the Hudson Plains showed  
 515 any trend pattern. These results indicate that the Streamflow Regime change has a spatial basis,  
 influenced by the location and ecozone, rather than by the Streamflow Regime Type.

Figure 12 near here.

Table 6 near here.

Figures S16-S21

520

### 3.3 Trends in Vegetation, Water, and Snow Satellite Indices

The spatial patterns of trends in the mean values of the three normalized difference indices are  
 presented in Figure 13. The spatial patterns of the trends in the maximum, mean, and minimum  
 of NDVI, NDWI, and NDSI are provided in Figures S22-S24 and are also summarized in  
 525 comparison with Streamflow Regime Type (Table 7), Trend Pattern (Table 8), and Ecozone  
 (Table 9). The tables show the fractions of stations grouped by trends that were significant at  
 $p \leq 0.05$ . In the figures significant trends ( $p \leq 0.05$ ) are shown as red (decreasing) or blue  
 (increasing) triangles, trends whose significance was  $\leq 0.10$  are shown as red or blue dots, and  
 those with no trend are plotted in black. There was a stronger association of the trends in the  
 530 three indices with spatial location and with ecozones than with Streamflow Regime type or  
 trend pattern. Frequently, the trends in vegetation, water, and snow satellite indices occur in a  
 spatial domain that follows the margin between two or more ecozones (Figures 13 & S22-S24).

Figure 13 near here.

Tables 7, 8, and 9 near here.

535 Figures S22-S24



## NDVI

The fractions of stations having statistically significant trends in NDVI were greater than the 5% expected by chance alone for most Streamflow Regime Types, as listed in Table 7, which shows the combinations of increasing and decreasing trends and each trend separately. For example, the fraction of all significant trends for maximum NDVI exceeds 5% in Streamflow Regime Types 1, 2, 3, 5, 9, & 10. The fraction of significant decreasing trends for maximum NDVI was greater than 5% for Streamflow Regime Types 1, 3, 5, 9 & 10. The fraction of increasing trends in maximum NDVI exceeds 5% in Streamflow Regime Types 1, 2, & 5. All significant trends in mean NDVI were increasing and occur in Streamflow Regime Types 1, 9, 11, & 12. Significant trends in minimum NDVI were predominately decreasing in Streamflow Regime Types 2, & 5 and increasing in Streamflow Regime Types 1, 11 & 12 and both increasing and decreasing trends in Streamflow Regime Type 4.

There were also more significant trends in NDVI than would be expected by chance alone in all Trend Patterns (Table 8). The fraction of basins having significant trends in maximum NDVI exceeds 5% in all Trend Patterns, except Trend Pattern 3 which had no basins with significant trends. All mean NDVI trends were increasing and occur only in Trend Patterns 1, 4, & 6. Minimum NDVI trends were predominately decreasing in all six Patterns and increasing in Trend Patterns 4 & 6.

The association of trends in mean NDVI between 1985 and 2010 with ecozones are each shown in Figures 13a, S22, & Table 9. There was a stronger association of NDVI trends with ecozones than with either Streamflow Regime Types or Trend Patterns. Increasing trends in mean NDVI occur in the Taiga Plains, Taiga Shield, Boreal Shield, Boreal Cordillera and Taiga Cordillera ecozones, decreasing trends in mean NDVI were found more often than expected by chance alone in the Montane Cordillera (Figure 13a & Table 9). The spatial patterns of trends in mean NDVI were similar to those of the maximum and minimum NDVI (Figure S23); however, there were more basins with significant trends in maximum and minimum NDVI than for mean NDVI. Basins with significant increasing trends in maximum NDVI were found in the western portion of the Prairies and in the Boreal Shield (Figure S22a & Table 9); decreasing trends in maximum NDVI were found in the southern portion of the Boreal Plains the eastern Prairies,



and the southern Boreal Plains and Boreal Shield (Figure S22a). The Taiga Plains has basins with both significant increasing and decreasing trends in minimum NDVI, decreasing trends were found at greater than expected by change alone in Taiga Shield, Boreal Plains, and Prairies (eastern); increasing trends were found in the Boreal Shield, Montane Cordillera, Boreal  
 570 Cordillera, and Taiga Cordillera (Figure S22c). Basins with significant trends were not randomly distributed through any ecozone, as spatial clustering was evident in each of the three NDVI trends in Figure S22.

#### *NDWI*

575 There were more significant trends in NDWI (i.e. hydrological storage) than would be expected by chance alone in most Streamflow Regime Types (Table 7) and they were more prominent in the mean and minimum NDWI than in maximum NDWI. Significant trends in maximum NDWI exceed 5% in Types 2, 5, 9, 11, & 12 with Streamflow Regime Types 9, 11, & 12 showing increasing trends much greater than the threshold (>20%), while Streamflow Regime  
 580 Types 2, 3, & 5 show decreasing trends in about 5% of the stations. Significant trends in mean NDWI include both decreasing trends in Streamflow Regime Types 1, 3, 4, 9, 11 & 12 and increasing in Streamflow Regime Types 2, 3, & 5. Significant trends in minimum NDWI were decreasing in Streamflow Regime Types 9 & 11 and increasing in Streamflow Regime Types 2 & 12 with both increasing and decreasing trends in Streamflow Regime Types 1, 3, 4, & 5.  
 585 The largest fraction of significant trends (> 33%) were decreasing trends in mean NDWI in Streamflow Regime Types 9, 11, & 12.

There were more significant trends in NDWI than would be expected by chance alone for all Trend Patterns (Table 8). Significant decreasing trends in maximum NDWI exceed the threshold 5% in Trend Patterns 1 & 6, and increasing trends in Trend Patterns 3 & 4 (Table 8).  
 590 Decreasing trends in mean NDWI exceed 5% in Trend Patterns 1 & 6, as do increasing trends in Trend Patterns 1 to 5. The fraction of basins with decreasing trends in minimum NDWI exceeded 5% in Trend Pattern 5 and for increasing trends in Trend Patterns 1, 4, 5, & 6. Only Trend Pattern 5, i.e. without a trend pattern, was found to have both increasing and decreasing trends in minimum NDWI.



595 The association of trends in mean NDWI with ecozones are shown in Figure 13b & Table 9  
 (Figure S23 shows results for maximum, mean, and minimum NDWI). Similar to NDVI, there  
 was a stronger spatial association of NDWI trends with ecozones than with either Streamflow  
 Regime Types or Trend Patterns. Decreasing trends in mean NDWI occur in the northern  
 ecozones (Taiga Plains, Taiga Shield, Boreal Cordillera, and Taiga Cordillera; Figures 13b &  
 600 S23b); increasing trends in mean NDWI occur only in the Prairies and Boreal Plains. There  
 were more significant trends in mean NDWI than in either maximum or minimum NDWI, but  
 the spatial patterns for mean NDWI trends were similar to those for maximum and minimum  
 NDWI. Basins with significant increasing trends in maximum NDWI were found only in the  
 western portion of the Prairies and the Boreal Shield (Figure S23a & Table 9); decreasing  
 605 maximum NDWI trends were found in the eastern portion of the Boreal Plains, and in the  
 Cordillera (Figure S23a). Both increasing and decreasing trends in minimum NDWI were  
 found in the Taiga Plains, Boreal Shield, Boreal Plains, and Montane Cordillera (Figure S23c).  
 Only decreasing trends were found in the Taiga Shield and Hudson Plains, and increasing  
 trends in minimum NDWI only occurred in the Prairies and Boreal Cordillera (Figure S23c).  
 610 Basins with significant trends were not randomly distributed through any ecozone, as spatial  
 clustering was evident in each of the three NDWI trends in Figure S23.

### *NDSI*

There were also more significant trends in NDSI (snow cover) than would be expected by  
 615 chance alone for all Streamflow Regime Types (Table 7); this was most prominent in the  
 minimum NDSI. Significant decreasing trends in maximum NDSI exceed the 5% of basins in  
 types 9, 11, & 12; increasing trends exceed 5% in Types 2, & 5. Only decreasing trends in  
 mean NDSI were detected in Streamflow Regime types 1, 4, 9, 11, & 12. Both decreasing and  
 increasing trends in minimum NDSI occurred in Streamflow Regime types 1, 3, 4, & 11; in  
 620 Streamflow Regime Type 9 only decreasing trends in minimum NDSI were found, and only  
 increasing trends in Types 2, 10, & 12. The fraction of stations showing increasing trends in  
 minimum NDSI was much greater than that of decreasing trends.

There were more significant trends in NDSI than would be expected by chance alone for all  
 Streamflow Regime trend patterns (Table 8) with increasing and decreasing trends having



625 similar frequencies. The fraction of significant decreasing trends in maximum NDSI exceeds 5% in Streamflow Regime trend patterns 1 & 6 (as was true for NDWI), and increasing trends in Trend Patterns 3, 4, & 5 (Table 8). No increasing trends were found in mean NDSI. Decreasing trends in maximum and mean NDSI exceed 5% in Trend Patterns 1 & 6, and for minimum NDSI in Trend Pattern 5. Increasing trends in minimum NDSI occurred in Patterns  
 630 1, 5, & 6. Only Trend Pattern 5, i.e. the pattern without a Streamflow Regime trend was found to have both increasing and decreasing trends in minimum NDSI.

The association of trends in NDSI with ecozones were shown in Figures 13c, S24, & Table 9. As with NDVI and NDWI, there was a stronger association of NDWI trends with ecozones than with Streamflow Regime Types or Trend Patterns. Decreasing trends in mean NDSI  
 635 occurred in the Taiga Plains, Taiga Shield, Boreal Shield, and Boreal Cordillera (Figure 13c, Table 9); there were insignificant increasing trends in mean NDSI, but significant increases were evident in Figure 13c in the Prairies and Boreal Plains. There were many more significant trends in minimum NDSI than in either maximum or mean NDSI (Table 9, Figure S24). The spatial patterns for mean NDSI were similar to those for maximum and minimum NDSI.  
 640 Basins with significant decreasing maximum NDSI trends were found in the Taiga Plains, Taiga Shield, and Boreal Cordillera (Figure S24a, Table 9); decreasing maximum NDSI were found in the eastern portion of the Boreal Plains, and in the Prairies. Trends in minimum NDSI were more numerous than for maximum or mean NDSI (Table 9) and include both increasing and decreasing trends in the Taiga Plains, Boreal Shield, and Boreal Plains (Figure S24c). Only  
 645 decreasing minimum NDSI trends were found in the Montane Cordillera, and increasing trends in minimum NDSI only occurred in the Prairies, Boreal Cordillera, and Taiga Cordillera. Basins with significant trends are not randomly distributed through any ecozone, as spatial clustering was evident in each of the three NDSI trends plotted in Figure S24.

### 650 3.4 Trend Patterns and Changes in Satellite Indices

Trend pattern 6 (Figure S21), with prominent winter increases in streamflow across the permafrost rich north (Taiga and Southern Arctic ecozones) was originally described by Whitfield & Cannon (2000). This region also has significant increases in mean NDVI (Figure 13a), and decreases in mean NDWI and NDSI (Figure 13b). At this scale, one interpretation  
 655 of the observed trends would be that warming has altered the seasonal pattern and depth of



frozen ground and has increased winter flows, groundwater connectivity, and also the greenness of these basins which suggests increased evapotranspiration, (Figures 13a & S22) and has reduced both the amount of standing water (Figures 13b & S23), and the snowcovered period (Figures 13c & S24).

660 Three other increasing Trend Patterns (1, 2, & 4) show different temporal patterns of change. These three patterns were observed on the Prairies and southern Boreal Plains. These three Trend Patterns have considerable spatial overlap (Figure 12).

Trend Pattern 1 (Figure S16) was common in the Manitoba portion of the Prairie and Boreal Plains ecozone, with greater streamflows throughout the period when data were available. This  
 665 region has no significant changes in mean NDVI (Figure 13a), nor in NDSI (Figure 13c), but there were increases in NDWI at the western edge of the region (Figure 13b). One interpretation is that changes in vegetation and snow indices have been subtle. Streamflows have increased without altering the greenness (and hence evapotranspiration) of these basins (Figures 13a & S22) or the snowcovered period (Figures 13c & S24), but there has been  
 670 increased wetness in the western side of this region (Figures 13b & S23). The increase in storage is indicative of higher precipitation in this poorly drained post-glacial landscape.

Trend Pattern 2 (Figure S17) was common in the Alberta and Saskatchewan portion of the Prairie, and the Saskatchewan and Manitoba portion of the southern Boreal Plains ecozone. This region has no significant trends in mean NDVI (Figure 13a), but does display significant  
 675 positive trends in mean NDWI (Figure 13b) and NDSI (Figure 13c). An interpretation is that the increasing trend in water storage (Figures 13b & S23) may be the result of increases in precipitation, and the increase in the snowcovered period may be due to increased snowfall, which through snowmelt runoff would also increase water storage (Figures 13c & S24), but the greenness of these basins has not been altered (Figures 13a & S22).

680 Trend Pattern 4 (Figure S19) was common across the Prairie and southern Boreal Plains ecosystems. The region has no significant trends in mean NDVI (Figure 13a) and only a few increasing trends in NDSI (Figure 13c), which were restricted to Saskatchewan, but with significant increases in mean NDWI (Figure 13b) except in Manitoba. Again here, the greenness of these basins has not changed (Figures 13a & S22), despite trends in indices  
 685 showing an increase in wetness (Figures 13b & S23) which may be the result of increases in





precipitation, and an increase in the snowcovered period which may be due to increased snowfall (Figures 13c & S24).

Trend Pattern 3 (Figure S18) was the only change pattern with decreasing streamflows and was common across the Prairie & southern Boreal Plains ecosystems. Decreasing trends in streamflow were more prevalent in the latter portion of the observed period. The region in which this pattern was observed is concentrated in the western part of the Boreal Plain and into the western portion of the Prairie ecosystem. This region has seen significant decreasing trends in mean NDVI (Figure 13a) and the overlap of the areas with Trend Pattern 3 basins corresponds well with those basins demonstrating significantly decreasing mean NDVI and without trends in NDWI (Figure 13b), or in mean NDSI (Figure 13c). The greenness of these basins (Figures 13a & S22) may have decreased because the basins are drier in summer since there are no decreases in wetness (Figures 13b & S23) or snowcover (Figures 13c & S24).

#### 4. Discussion

This study set out to demonstrate an alternative approach to classifying streamflow regimes, to look for common seasonal trend patterns using a warm season annual common time window across a large spatial domain, and to confirm or contrast hydrological changes with trends in satellite indices. The approach used here was targeted to assess those aspects that have changed and why, the basic element being the hydrological response that depends upon the key streamflow-generating processes in each basin. Analyses of change in this analysis were focused on seasonal patterns rather than on annual measures. In trend studies, time periods are selected that are a trade-off between record length and network density (Hannaford *et al.* 2013). Given the large datasets, where stations have records for differing years, where gaps of years may exist in the streamflow record, and with a large number of basins that have only warm-season data, the results remain consistent over a wide range of period lengths of trend tests, with ~80% of results remaining unchanged, for periods greater than 30 years (Figure 11). This suggests that the use of this unconventional methodology is entirely justified for trend studies, using record lengths greater than 30 years. Determining the *magnitudes* of trends in annual runoff or other annual attributes using this methodology is not appropriate.



By focusing on the warm-season annual common time window, the complex spatial structure seasonal pattern in flows and trends can be explored. In the large spatial domain of this study, it is essential that spatial linkages and patterns are considered for both Streamflow Regime Types and Trend Patterns. Using as many stations as possible, stations with continuous or  
 720 seasonal operation, provides more resolution of the spatial extent of changes. Trends in streamflow due to climate or landscape changes are not expected to be spatially uniform (Carey *et al.* 2010; Patterson *et al.* 2012).

#### 4.1 Streamflow Regime types

725 Streamflow regimes are a useful way of considering seasonal hydrology (Bower *et al.* 2004). Unfortunately, the large numbers of standardized streamflows plotted in Figure 6 make it difficult to compare the Streamflow Regime Types; plotting the z-score centroids of each (Figure 8) makes the comparisons clearer. Each of the Streamflow Regime Types centroids have a dominant peak, and a specific shape. The peaks may be narrow (Types 1 & 11) or broad  
 730 (Types 3, 4, 9 & 12). Streamflow Regime Types 2 & 5 associated with the Prairies were not always sampled on the rising limb, because a) the peaks are due to snow melt, b) the Prairies melt early in the year, and c) the snow melt period often occurs before the beginning of the annual common time window.

Sample hydrographs of individual stations from each type, are shown in Supplementary Figures  
 735 S2-S13. These similarities among the stations are due to the predominance of snowmelt as the source of streamflow in this cold region, and the differences are related to the combinations of landscape processes that mediate the melt (hypsometry, surface storage, groundwater, and glaciers). The classification produced by the algorithm is spatially reasonable in that stations from similar landscapes, hydrology, and climates were clustered together (Table 3). Stations  
 740 which are nested along a single basin (e.g. Athabasca River, Type 3) were clustered together as the signal derived from the mountains propagates downstream. Distinctions between clusters draining differing terrains, which overlap spatially, such as at the boundary between the Cordillera and Prairies, are to be expected as the landscape gradients or differences are large. Similar results were found in Ontario (Razavi & Coulibaly 2013). Three clusters  
 745 (Streamflow Regime Types 6, 7, & 8) each contained a single member and one (Type 10) had only two members. These Streamflow Regime Types are very different from those containing



large numbers of members and any clustering of hydrographs in this way must balance common characteristics against uniqueness. Overall, the use of dynamic time warping overcomes the timing differences due to latitude and elevation. While median flows were used here because of the large number of stations, individual years could be used to develop a consensus clustering if a smaller number of stations were to be used.

## 4.2 Trend Patterns

Like the Streamflow Regime Types, the Trend Patterns also show strong spatial organization; one pattern of decreasing trends, four types of increasing trends, and a large group without trends (Table 5). There was no clear link between the Streamflow Regime Type and the Trend Pattern (Table 5). Basins in mountainous areas generally lack consistent patterns of trends, but some exceptions do occur. This is counter to many studies that have shown late summer streamflow declines (Jost *et al.* 2012; Fleming & Dahlke 2014).

The Trend Patterns have spatial distributions that appear to be unrelated to individual ecozones but, as would be expected from past descriptions of the predominant climate processes on the Prairies, drying in the west and wetting in the east (Borchert 1950; Rosenberg 1987; Luckman 1990, Whitfield *et al.* 2020), and extending beyond any one ecozone. For example, over the Prairie ecozone (Figure 12), there are three Trend Patterns with differing patterns of increasing streamflow. Trend Pattern 1 basins are located at the eastern and western margins of the Prairies in the partly forested “parkland” ecozone fringe (Figures 12 & S16). Trend Pattern 2 basins are located across the Prairies but are concentrated in the more humid east and in the eastern portion of the forested Boreal Plains (Figures 12 & S17). Trend Pattern 4 basins are scattered across the Prairies and occur along the southern margins of the Boreal Plains (Figures 12 & S19). The decreasing Trend Pattern 3 basins are prominent in the foothills, boreal forest, and grassland region just east of the Rocky Mountains across the Boreal Plains and just west of the Prairies (Figure S18).

Although annual trends in climate and streamflow have been reported widely (e.g. Zhang *et al.* 2001; Peterson *et al.* 2002; Déry *et al.* 2009a; St. Jacques & Sauchyn 2009; Shook & Pomeroy 2012; Vincent *et al.* 2015, 2018), seasonal studies are less common, although they allow determination of process shifts at finer scales of analysis (Whitfield & Cannon 2000;



Whitfield *et al.* 2002; Bennett *et al.* 2015; Auerbach *et al.* 2016). The focus of the present study was on runoff timing changes using methods originally developed by Leith & Whitfield (1998) and subsequent improvements (Déry *et al.* 2009b). Many of the changes reported here  
 780 have been observed by others. Increased winter streamflow in northern Canada was reported by Whitfield & Cannon (2000) and others subsequently (St. Jacques & Sauchyn 2009; Bawden *et al.* 2015). Timing shifts have been reported, particularly in the onset of the spring freshet (Burn 1994; Westmacott & Burn 1997) and smaller summer recessions (Leith & Whitfield 1998). In the headwater basins of the Columbia River basin in British Columbia,  
 785 the timing of spring snowmelt runoff only changed slightly and summer flows were unchanged (Hatcher & Jones 2013). The spatial extent of changes in basins on the Boreal Plains and Prairies are novel findings as studies in the past have seldom incorporated data from hydrometric stations with seasonal records. Using a classification of annual runoff patterns in streams across the Prairies and adjacent areas, Whitfield *et al.* (2020) determined  
 790 that basins in the eastern portion of the Prairies were becoming wetter, and basins in the west becoming drier as would be expected (Borchert 1950), and consistent with the increased streamflows reported for Smith Creek (Dumanski *et al.* 2015). However, no changes in precipitation or runoff of most seasonal and continuous streamflow records were detected in the Prairies (Ehsanzadeh *et al.* 2016). Several studies of precipitation in summer across the  
 795 Prairies reflect similar pattern changes (Akinremi *et al.* 1999; Asong *et al.* 2016; DeBeer *et al.* 2016). In the US Great Plains, intensified drying and increased numbers and durations of low flow periods and greater flow events of shorter duration were identified (Chatterjee *et al.* 2018).

The spatial clustering of Trends Patterns does not coincide with Streamflow Regime types, or  
 800 exactly with ecozones. The contiguous change regions are broad in space and span ecozone boundaries. This is indicative of changes that are taking place at scales different from those that generate runoff (Streamflow Regime type), but are related to broad-scale changes that would be expected with changes in weather and climate patterns across the southern portion of the study area and with climate warming in the northern portion. These patterns were partially  
 805 described by Whitfield & Cannon (2000), and they have been explored and reported on by others since (Burn & Hag Elnur 2002; Woo & Thorne 2003; Fleming 2007; Janowicz 2008; Bawden *et al.* 2015; Tan *et al.* 2017).



### 4.3 Trends in Vegetation, Water, and Snow Satellite Indices

810 The primary interest in trends of normalized difference indices (NDVI, NDWI, & NDSI) was to determine whether the changes were driving or following observed streamflow trend patterns. Changes in land use and hydrology at the basin scale can drive streamflow regime changes (Fohrer *et al.* 2001; Woo *et al.* 2008). Satellite imagery is increasingly being used for basin-scale analysis, but these studies generally focus on a small number of cases in a small  
 815 region (Coppin *et al.* 2004; Bevington *et al.* 2018; Soulard *et al.* 2016; Militino *et al.* 2018; Jorgenson *et al.* 2018; Lee *et al.* 2018).

The results presented here demonstrate several broad spatial patterns of change that warrant closer examination in the future. Four specific regions have results that demonstrate significant changes, or lack thereof, in hydrology and satellite indices. These four regions correspond to  
 820 areas with changes in water storage (Rodell *et al.* 2018); precipitation increases in northern Canada, a progression from a dry to a wet period in the eastern Prairies/Great Plains, a region of surface water drying in the eastern Boreal, and of no change along the Rocky Mountains. While these GRACE trend regions are consistent with the results presented here, the mechanisms that Rodell *et al.* (2018) suggest are not.

825 *North of 60°*

Warming has increased winter flows (Figures 10 & S21) (Whitfield *et al.* 2004) and increased the greenness of these basins (Figures 13a & S22) and reduced both the amount of standing water (Figures 13b & S23), and the snowcovered period (Figures 13c & S24). Climate change is expected to affect Arctic hydrology by decreasing snowcover and snowfall, decreasing  
 830 depths of soil freezing; increasing snow-free season rainfall; the moving northward of the southern limit of permafrost; and, causing an earlier snowmelt with more frequent ice lenses (Kane 1997); however, it may also increase snowfall and snowcover in places (Krogh & Pomeroy 2019). In northern Canada, regional and local hydrology are controlled by permafrost thaw (Kane 1997; Woo *et al.* 2000; Whitfield & Cannon 2000; Cannon & Whitfield 2002;  
 835 Janowicz 2008; St. Jacques & Sauchyn 2009) increasing surface and subsurface connectivity, and increasing winter baseflow (Connon *et al.* 2014; Liljedahl *et al.* 2016; Carpinio *et al.* 2018; Quinton *et al.* 2018). Annual runoff in the Mackenzie River has increasing trends in due to



increasing annual flow trends in the Liard and Peace Rivers (Woo *et al.* 2000, 2008; Déry *et al.* 2009a; Rood *et al.* 2017).

840 Rodell *et al.* (2018) attributed the increasing trends in GRACE water storage in northern Canada to increased freshwater accumulations (e.g. Forman *et al.* 2012). Increasing trends in MODIS temperature and moisture patterns were more common than decreases (Potter & Crabtree 2013). Changes in the timing and peaks of streamflow have occurred in snowmelt-dominated streams of Boreal Alaska, with increasing winter flows, freshet flows, and  
 845 decreasing flows post-freshet similar to values observed here (Bennett *et al.* 2015). Climate driven changes in one taiga/tundra basin include decreasing snowfall, sublimation, soil moisture and evapotranspiration, deeper active layer, and an earlier loss of snow cover (Krogh & Pomeroy 2018). The results presented here indicate increased streamflow, particularly in winter, and basin wetness in a wide region north of 60°; however, the total number of basins  
 850 with data remains small.

#### *The Boreal Plains*

In the Boreal Plains, there has been more warming in winter and spring than in summer; none of the climate stations examined by Price *et al.* (2013) and Ireson *et al.* (2015) showed significant trends in annual precipitation over the interval 1950-2010, but some exhibited a  
 855 significant decline in annual snowfall and snowfall fraction due to a shortened cold season and earlier snowmelt. In the western Boreal Plains there has been a pervasive decrease in warm season streamflow (Figures 10 & S18) accompanied by a decrease in the greenness of these basins (Figures 13a & S22) because these basins are drier in summer although satellite images do not show a change in water storage (Figures 13b & S23) or snowcover (Figures 13c & S24).  
 860 The Boreal Plains are expected to be a region of strong ecological sensitivity under a changing climate (Ireson *et al.* 2015). The southern margins of the Aspen Parkland (a Prairie ecoregion) and Boreal followed the climatic moisture suggesting that moisture supplies limit the southern extent of the forest (Hogg 1994). The driest regions of the Boreal forest are found at low elevations in west-central Manitoba, across Saskatchewan and Alberta and the southwest  
 865 Northwest Territories; the boundary follows the zero isoline of the water budget (precipitation minus potential evapotranspiration) (Hogg 1994). These regions are drying causing increased risks of forest fire (Groisman *et al.* 2004). The Boreal Plains are expected to become drier and to have increased frequencies of vegetation shifts and disturbances; forests are expected to

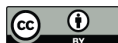

contract in the north while the southern margin will remain stationary (Ireson *et al.* 2015).  
870 Chronic moisture deficits are the controlling factor of the boundary between forest and  
grassland in western Canada (Hogg 1994). In the Boreal Plains, evapotranspiration and  
changes in soil storage dominate water the balance (Devito *et al.* 2005). Rodell *et al.* (2018)  
suggest that the decreasing trend in “central Canada” [actually, their region would be the  
western Boreal], were attributed to snow cover declines and to recent drying (Bouchard *et al.*  
875 2013).

The subarctic climate of the Boreal region has large inter-annual variability and will be prone  
to future climate change (Woo *et al.* 2008). Models suggest that future winter flows will  
increase, spring snowmelt will advance, but peak and summer flows will decline because  
evapotranspiration will have increased (Devito *et al.* 2005). The results presented here confirm  
880 these widespread drying trends in the western portion of the Boreal Plains.

### *The Prairies*

Many studies of the Prairies published before 2010 showed drying trends, while more recent  
literature reports extensive wetting. The climate of the Prairies has become warmer and drier  
in the previous 50 years, and summer streamflows have decreased (Gan 1998). More recent  
885 literature demonstrates recent increases in precipitation; e.g. Gerken *et al.* (2018) describe the  
increases in precipitation and decreases in temperature in the Canadian Prairies during summer  
increasing both the probabilities of convection and atmospheric moisture. Garbrecht *et al.*  
(2004) report increasing trends in precipitation, streamflow, and evapotranspiration on the  
Great Plains where a 16% increase in precipitation led to a 64% increase in streamflow that  
890 occurred in fall, winter, and spring. The seasonality and timing of streamflow in the north-  
central United States (Missouri, Souris-Red-Rainy, and Upper Mississippi Basins) has  
changed, i.e. northern portions have earlier snowmelt peaks, and the probabilities of summer  
and fall streamflow peaks have increased (Ryberg *et al.* 2015). The number of days with  
snowfall and heavy snowfall has decreased in the western Canada and increased in the north  
895 (Vincent *et al.* 2018). The western Prairie (Mixed Grassland and Cypress Upland ecoregions)  
are becoming drier while the northern and eastern portions (Aspen Parkland ecoregion) have  
increasing runoffs (Whitfield *et al.* 2020).



Three streamflow Trend Patterns (1, 2, & 4) show increasing streamflows with different temporal patterns of change (Figures 10, S16, S17 & S20) and overlap the Prairies and southern Boreal Plains (Figure 12). Change Pattern 1 basins (Figure S16) are located in the eastern Prairies, and the adjacent Boreal Plains and are accompanied by increases in NDVI and no changes in NDWI or NDSI. Change Pattern 2 (Figure S17) is common in the Alberta and Saskatchewan portion of the Prairie, and the Saskatchewan and Manitoba portion of the southern Boreal Plains ecozone and was accompanied by increases in NDWI and NDSI but not by changes in NDVI. Change Pattern 4 (Figure S19) is also common over the Prairie and southern Boreal Plains ecosystems. This region also has few significant changes in mean NDVI (Figure 13a) or NDSI (Figure 13c), but shows increases in NDWI at the western edge of the region (Figure 13b). These changes are complex and exhibit a series of changes in streamflow, greenness, and snowcover from east to west. In the Aspen Parkland ecoregion, the northern Prairie adjacent to the Boreal Plains, has shown increased streamflows (Whitfield *et al.* 2020). The apparent wetting trend on the northern Great Plains was attributed to a drought that took place before GRACE was deployed followed by years with above-normal precipitation (Rodell *et al.* 2018).

The poorly drained, post-glacial drainage basins of the Prairie pothole region have high inter-annual variability of annual precipitation (Millett *et al.* 2009; Hayashi *et al.* 2016), and there has been oscillation on the decadal scale between wet and dry conditions (Winter & Rosenberry 1998). A set of 16 closed-basin lakes in the Prairie pothole region that show long-term declining water levels over the 20<sup>th</sup> Century provides a measure of the balance between precipitation and evaporation (van der Kamp *et al.* 2008). Since the 1990s the southern Prairie pothole region has been influenced by an extended period of increased wetness resulting in higher water levels (McKenna *et al.* 2017).

The 100<sup>th</sup> meridian divides North America into an arid west and a humid east, which is expressed in vegetation, hydrology, and agriculture (Seager *et al.* 2018a, 2018b). This gradient arises from atmospheric circulation and the transport of moisture. In winter, regions west of the meridian are sheltered from Pacific storm precipitation; in summer a southerly flow moves air from the southwest and Gulf of Mexico northwards with a strong west-east moisture transport. Under increasing greenhouse gases the divide is expected to move eastward,





resulting in spread of aridity (Seager *et al.* 2018b). The results presented here indicate that increasing wetness near the meridian is shifting westward in Canada.

### 930 *The Mountains*

Most of the basins (73%) in the Cordillera (Montane, Boreal, and Taiga) fall into Trend Pattern 5 (Table 6, Figure S20) which has a general lack of structure in changes. Elevation becomes important to the pattern of climate change over western North America only when a significant continental-scale warming dominates, and it is not detectable in the early stages of  
 935 climate change (Fyfe & Flato 1999). The lack of trends or timing shifts despite dramatic climate change and decline in low elevation snowpacks has been found at smaller scales such as Marmot Creek Research Basin in the montane cordillera of the central Canadian Rockies (Harder *et al.* 2015). Many of these basins show some periods with increases or decreases in flow consistent with freshet timing changes (e.g. Figures 2 & 3), but there was a lack of  
 940 consistency as indicated by the inability for a cluster of statistically similar patterns to be formed. These timing shifts have been widely reported (Leith & Whitfield 1998; Luckman 1998; Whitfield & Cannon 2000; Rood & Samuelson 2005; Forbes *et al.* 2011; Bennett *et al.* 2015; Luce 2018; Philipsen *et al.* 2018; and others). Basins in these ecozones do have trends in NDVI, NDWI, and NDSI, but the results are mixed (Table 9). The fraction of basins with  
 945 decreasing trends in mean NDVI only just exceeds the 5% threshold in the Montane Cordillera (6%), both mean NDWI and mean NDSI exceed the threshold in the Boreal Cordillera (25%) and Taiga Cordillera (100%). Increases in mean NDVI exceed the threshold in the Boreal Cordillera (25%) and Taiga Cordillera (100%) and there are no increasing trends in these three ecozones for either NDWI or NDSI, suggesting that changes  
 950 are more prevalent in the north than in the south. Using a modelling approach, (Bennett *et al.* 2012; Schnorbus *et al.* 2014) demonstrated that detecting climate driven changes in basins in the British Columbia Rocky Mountains were difficult because of model uncertainty. Despite the ongoing deglaciation in the mountains of the west (Clarke *et al.* 2015) streamflows in basins in the Canadian Rockies can be resilient to changes in climate (Harder *et al.* 2015,  
 955 Whitfield & Pomeroy 2016).



#### 4.4 Remaining Questions, Significance and Future Work

In the Arctic, the patterns, magnitudes, and mechanisms of hydrological and ecological change are often unpredictable or difficult to separate from other drivers (Hinzman *et al.* 960 2005). In many disciplines, understanding the complexity of the Arctic is challenged by a lack of scientific knowledge, observational and experimental time series, and the technical and logistic constraints of Arctic research. In the Boreal, Ireson *et al.* (2015) indicate that the current monitoring of climate, hydrology, and ecology are insufficient for understanding or predicting the potential responses to either human activities or a changing climate. Even with 965 inclusion of more than 200 stations that are observed seasonally, there are regions in the study domain, particularly north of 60° that have too few observations, and consequently the basins that are observed are often larger compared to than those in southern regions.

It is important to note that climate signals, particularly for the Pacific Decadal Oscillation [PDO] and Arctic Oscillation [AO] were not considered here. Oscillation in the climate system 970 can be manifest as tests on short time periods (Chen and Grasby 2009; Hannaford *et al.* 2013). Bennett *et al.* (2015) showed some connections of streamflow in Boreal Alaska to PDO, but not to AO. The interannual variability of the Liard River is correlated to the PDO (Rood *et al.* 2017). Within mountainous areas, such as the Cordillera, the hydrological response to the regional climate variability signal is likely to be modified by local factors including location, 975 topography, and land characteristics (Thorne & Woo 2011). Future work should consider adapting the methodology presented here to examining the relationships of streamflow to these climate signals (and others), by resampling the available station records including complete and partial year streamflow records in relation to the climate indices.

Are landscape changes related to initial state, and are they a response to or a driver of 980 hydrological change? Broad-scale studies examining streamflow trends and timing changes should employ multiple methods across different scales and consider regime-dependent shifts to better identify and understand changes (Bennett *et al.* 2015). Here, it was shown that there are several coincident and overlapping regions of change in streamflow and in satellite indices. Further studies, at a finer spatial scale, will be required to determine process drivers and 985 responses.

The main premise of this study was to let the available data tell the story of hydrological structure and change in this large study domain. Including data from seasonal stations that

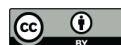

only report a part of the year more than doubled the number of stations available for analysis, and most of these stations are located in the Prairie ecozone which has often been omitted in studies because of the lack of continuous data. The available data are messy, and there was an uneven distribution of stations by ecozones. Determining the magnitudes of annual trends was not appropriate with the approach used because of the inconsistency of years of data between sites, but by including the data from seasonal stations and an annual common time window rather than only entire years, the results provide an interesting spatial story of trend direction. While there are timing shifts in many Cordillera basins, the changes are inconsistent between sites, suggesting a resilience to change in complex terrain as reported by Harder *et al.* (2015). In the north, winter streamflows are increasing, and these are reflected in changes detected in satellite indices. The western Boreal Plains, basins exhibit decreasing trends in streamflow and are less green (NDVI). There was a complex pattern of changing streamflows across the Prairies, with some drying in the west and areas with different patterns of increased streamflow particularly in the northeast Prairies.

The results presented here are informing several science research agendas in Canada and internationally. The motivation for this study came from the NSERC Changing Cold Regions Network study of 2013-2018 (DeBeer *et al.* 2015) which had an objective to integrate existing and new sources of data with improved predictive and observational tools to understand, diagnose and predict interactions amongst the cryospheric, ecological, hydrological, and climatic components of the changing Earth system at multiple scales, with a geographical focus on Western Canada's rapidly changing cold interior. The results also contribute to the Global Water Futures programme of 2016-2023 ([www.globalwaterfutures.ca](http://www.globalwaterfutures.ca)), which has an overarching goal to deliver risk management solutions to manage water futures in Canada. The first step to managing future water changes is to understand those of the recent past that are currently underway and this study makes a strong contribution to that process. In particular, this study represents a step forward in addressing the complexity of hydrological change; there are many studies of individual basins where, when results are considered individually, tend to be more anecdotal than systematic. It is indeed simpler and easier when there are only a few cases to consider with common variables and record length, as in many studies, but with large numbers of basins the tools for dealing with significant changes are more limited. Sensitivity studies that assess the limits of partial year analysis of hydrological structure and change are required and seem a logical next step.



1020

## 5. Conclusions

This study uses accepted techniques with a very large dataset to compare existing and new sources of data to understand and diagnose interactions amongst the climatic, hydrological, and ecological components of Western Canada's rapidly changing cold interior. Methods were used in a novel manner that treated hydrometric stations with only warm season observations in the same way as continuously observed basins. Interpreting the results from any fixed period may not be representative of historical variability (Hannaford *et al.* 2013). A new clustering methodology, dynamic time warping, which overcomes differences in timing due to latitude or elevation, separated stations based on Streamflow Regime type. A clustering of the seasonal pattern of Streamflow Regime change allowed the examination of the relationship of change to Streamflow Regime types and to ecozones. Spatial location, rather than Streamflow Regime type, was a strong determinant of change and was consistent with large-scale change in the climate system.

Trends in satellite indices (NDVI, NDWI, & NDSI), obtained from time series derived from Landsat observations, allow trends in these indices to be related to hydrological changes in nearly 400 basins. While there are no simple one-to-one correspondences among Streamflow Regime types, seasonal pattern changes, and satellite indices, four prominent regions of changes were diagnosed; these regions were also identified by Rodell *et al.* (2018) to have changes in water storage as determined from GRACE satellites.

1040 *North of 60°*

Increased streamflows, particularly in winter, are taking place in the northern portion of the Mackenzie Basin. In these basins, and in the general region, mean NDVI has not changed, but mean NDWI and NDSI have decreased. Degrading permafrost resulting in increased winter streamflow is an important change, which has been observed to take place in this region, and which may be driving the observed changes in NDWI. Decreasing snowcover, evidenced by decreased NDSI may be reflected in the shift in the partition of rainfall and snowfall due to warmer spring transition periods.

*The Boreal Plains and the western Prairies*



Decreased streamflows occur in these basins. In this area in general, mean NDVI has  
1050 significantly decreased, but along the western margin mean NDWI and NDSI have increased.  
Decreased NDVI was consistent with decreased streamflow; as basins become drier vegetation  
will be impacted. Increases in mean NDWI and NDSI occur only at the western margin of this  
region suggesting a zone with complex gradients and changes.

#### *The eastern Prairies*

1055 Increased streamflows in summer and fall are occurring across the Prairies, particularly in the  
east, and along the northern margin and the southern margin of the Boreal Plains. Three types  
of hydrological changes are evident with differing spatial locations, but the overlap between  
types suggests that there are multiple processes involved. In these basins, and in this area in  
general, mean NDVI has significantly increased, mean NDWI has increased, and mean NDSI  
1060 has not changed. This is consistent with the higher rainfall ratio observed since the 1950s in  
the region, recent higher summer precipitation and both increased water storage and drainage  
reported in the northern and eastern Canadian Prairies. Basins in the eastern Prairie show  
increased streamflows through the entire period of the year that data are available. Some  
basins, which are centred in Saskatchewan, show increases only during summer and fall which  
1065 are indicative of changes in the streamflow regime from nival towards pluvial. Some basins  
show only a narrow time of the year with increased streamflows, which was the largest of these  
three change patterns, and are found in the western Prairie and along the margin between the  
Prairie and Boreal Plains. In these basins, mean NDVI has not changed, but NDWI has  
increased in basins in Saskatchewan and Alberta, and mean NDSI has increased in  
1070 Saskatchewan. These differences may reflect the differences in the three change patterns. The  
existence of the east to west gradient of these changes was predicted by previous climatological  
studies (Borchert 1950; Rosenberg 1987; Luckman 1990).

#### *The Mountains*

The mountain basins in this study appear to be resilient to change. These basins demonstrate  
1075 several hydrograph types but generally lack structure in trend patterns. Individually, these  
basins do show periods with increases or decreases in streamflow consistent with freshet  
timing changes, as has been reported elsewhere, but there was sufficient inconsistency among  
the basins to define a specific pattern. Basins in these ecozones do have trends in NDVI,



NDWI, and NDSI, but the results are mixed. There are decreasing trends in mean NDVI in  
1080 the Montane Cordillera, and mean NDWI and mean NDSI in the Boreal Cordillera and Taiga  
Cordillera, and increasing trends in mean NDVI in the Boreal Cordillera and Taiga Cordillera  
and there are no increasing trends in these three ecozones for either NDWI or NDSI;  
decreasing trends are more prevalent in the north than in the south.

1085 The approach using an annual common time window presented here combines many more  
stations and years of data and increases the number of stations available for analysis quite  
dramatically from previous fixed time window methods. Analysis of only the annual  
common time window demonstrates groups with common spatial patterns in streamflow  
regimes, and groups with common streamflow trends. A common annual time window in the  
1090 warm season provides sufficient information to adequately resolve regional streamflow  
patterns and seasonal streamflow trends.

## 6. Data Availability

Streamflow data and basin delineations are available from Water Survey of Canada  
1095 (Environment and Climate Change Canada). Satellite imagery is available from NASA, USGS,  
and NOAA through Google Earth Engine.

## 7. Information about the Supplement

Supplementary Figures S1-S24

1100

## 8. Author Contributions

PHW and JWP outlined the original study form with input from KRS. PK and PHW designed  
the extraction of satellite indices that was performed by PK. The statistical analysis of  
streamflow was conducted by PHW with assistance from KRS. The trend analysis of satellite



1105 indices was conducted by PHW with input from PK and JWP. The manuscript was drafted by  
PHW; all authors contributed to the interpretation and final manuscript.

## 9. Competing Interests

The authors declare that they have no conflict of interest.

1110

## 10. Acknowledgements

Funding was provided by the Natural Science and Engineering Research Council of Canada through Discovery Grants and through the Changing Cold Regions Network, and by the Canada Research Chairs, the Canada Excellence Research Chairs programs and the Global  
1115 Water Futures program. Streamflow data were obtained from Water Survey of Canada (Environment and Climate Change Canada). Satellite imagery was provided by NASA, USGS, and NOAA through Google Earth Engine. We appreciate being able to use the R-packages identified in the methods and the contributions of many people to the CSHShydRology package and to the R Development Core Team. The comments and  
1120 suggestions of the Editor, two anonymous reviewers, and Malcolm Clark are greatly appreciated. Jim Freer provided welcomed comments and advice during the review process. Chris DeBeer and Ajay Bajracharya kindly provided the basin shapefiles. Finally, we appreciate the enthusiastic support of colleagues in the members of the Changing Cold Regions Network who have commented and made suggestions throughout this study.

1125

## 11. References

Agarwal, A., Maheswaran, R., Kurths, J., and Khosa, R.: Wavelet spectrum and self-organizing maps-based approach for hydrologic regionalization -a case study in the



- 1130 western United States, *Water Resources Management*, doi:10.1007/s11269-016-1428-1, 2016.
- Akinremi, O. O., McGinn, S. M., and Cutforth, H. W.: Precipitation trends on the Canadian Prairies, *Journal of Climate*, 12, 2996-3003, doi:10.1175/1520-0442(1999)012<2996:PTOTCP>2.0.CO;2, 1999.
- 1135 Anderson, E. P., Chlumsky, R., McCaffrey, D., Trubilowicz, J. W., Shook, K. R., and Whitfield, P. H.: R-functions for Canadian hydrologists: a Canada-wide collaboration, *Canadian Water Resources Journal / Revue canadienne des ressources hydriques*, 44, 108-112, doi:10.1080/07011784.2018.1492884, 2018.
- Asong, Z. E., Khaliq, M. N., and Wheeler, H. S.: Multisite multivariate modeling of daily  
 1140 precipitation and temperature in the Canadian Prairie Provinces using generalized linear models, *Climate Dynamics*, online, doi:10.1007/s00382-016-3004-z, 2016.
- Auerbach, D. A., Buchanan, B. P., Alexiades, A. V., Anderson, E. P., Encalada, A. C., Larson, E. I., McManamay, R. A., Poe, G. L., Walter, M. T., and Flecker, A. S.: Towards catchment classification in data-scarce regions, *Ecohydrology*, online,  
 1145 doi:10.1002/eco.1721, 2016.
- Bawden, A. J., Burn, D. H., and Prowse, T. D.: Recent changes in patterns of western Canadian river flow and association with climatic drivers, *Hydrology Research*, 46, 551-565, doi:10.2166/nh.2014.032, 2015.
- Bennett, K. E., Werner, A. T., and Schnorbus, M. A.: Uncertainties in hydrologic and climate  
 1150 change impact analyses in headwater basins of British Columbia, *Journal of Climate*, 25, 5711-5730, doi:10.1175/JCLI-D-11-00417.1, 2012.
- Bennett, K. E., Cannon, A. J., and Hinzman, L.: Historical trends and extremes in boreal Alaska river basins, *Journal of Hydrology*, 527, 590-607, doi:10.1016/j.jhydrol.2015.04.065, 2015.
- 1155 Berndt, D. J., and Clifford, J.: Using dynamic time warping to find patterns in time series, *AAAI Technical Report WS-94-03*, 359-370, 1994.
- Bevington, A., Gleason, H., Giroux-Bougard, X., and de Jong, J. T.: A review of free optical satellite imagery for watershed-scale landscape analysis, *Confluence: Journal of Watershed Science and Management*, 2, doi:10.22230/jwsm.2018v2n2a18, 2018.





- 1160 Borchert, J. R.: The climate of the central North American grassland, *Annals of the Association of American Geographers*, 40, 1-39, 1950.
- Botter, G., Basso, S., Rodriguez-Iturbe, I., and Rinaldo, A.: Resilience of river flow regimes, *Proceedings of the National Academy of Sciences*, 110, 12925-12930, doi:10.1073/pnas.1311920110, 2013.
- 1165 Bouchard, F., Turner, K. W., MacDonald, L. A., Deakin, C., White, H., Farquharson, N., Medeiros, A. S., Wolfe, B. B., Hall, R. I., and Pienitz, R.: Vulnerability of shallow subarctic lakes to evaporate and desiccate when snowmelt runoff is low, *Geophysical Research Letters*, 40, 6112-6117, doi:10.1002/2013GL058635, 2013.
- Bower, D., Hannah, D. M., and McGregor, G. R.: Techniques for assessing the climatic  
 1170 sensitivity of river flow regimes, *Hydrological Processes*, 18, 2515-2543, doi:10.1002/hyp.1479, 2004.
- Burn, D. H.: Hydrologic effects of climate change in west-central Canada, *Journal of Hydrology*, 160, 53-70, doi:10.1016/0022-1694(94)90033-7, 1994.
- Burn, D. H., and Hag Elnur, M. A.: Detection of hydrologic trends and variability, *Journal of*  
 1175 *Hydrology*, 255, 107-122, doi:10.1016/S0022-1694(01)00514-5, 2002.
- Buttle, J. M., Boon, S., Peters, D. L., Spence, C., Tromp-van Meerveld, H. J., and Whitfield, P. H.: An overview of temporary stream hydrology in Canada, *Canadian Water Resources Journal*, 37, 279-310, doi:10.4296/cwrj2011-903, 2012.
- Cannon, A. J., and Whitfield, P. H.: Downscaling recent streamflow conditions in British  
 1180 Columbia, Canada using ensemble neural network models, *Journal of Hydrology*, 259, 136-151, doi:10.1016/S0022-1694(01)00581-9, 2002.
- Carey, S. K., Tetzlaff, D., Seibert, J., Soulsby, C., Buttle, J. M., Laudon, H., McDonnell, J., McGuire, K., Caissie, D., and Shanley, J.: Inter-comparison of hydro-climatic regimes across northern catchments: Synchronicity, resistance and resilience, *Hydrological*  
 1185 *Processes*, 24, 3591-3602, doi:10.1002/hyp.7880, 2010.
- Carpino, O., Berg, A. A., Quinton, W. L., and Adams, J.: Climate change and permafrost thaw-induced boreal forest loss in northwestern Canada, *Environmental Research Letters*, doi:10.1088/1748-9326/aad74e, 2018.



- Céréghino, R., and Park, Y.-S.: Review of the Self-Organizing Map (SOM) approach in water  
 1190 resources: Commentary, *Environmental Modelling & Software*, 24, 945-947,  
 doi:10.1016/j.envsoft.2009.01.008, 2009.
- Chatterjee, S., Daniels, M. D., Sheshukov, A. Y., and Gao, J.: Projected climate change  
 impacts on hydrologic flow regimes in the Great Plains of Kansas, *River Research and  
 Applications*, doi:10.1002/rra.3249, 2018.
- 1195 Chen, Z., and Grasby, S. E.: Impact of decadal and century-scale oscillations on hydroclimate  
 trend analyses, *Journal of Hydrology*, 365, 122-133, 2009.
- Clarke, G. K. C., Jarosch, A. H., Anslow, F. S., Radić, V., and Menounos, B.: Projected  
 deglaciation of western Canada in the twenty-first century, *Nature Geoscience*, online,  
 doi:10.1038/ngeo2407, 2015.
- 1200 Connon, R. F., Quinton, W. L., Craig, J. R., and Hayashi, M.: Changing hydrologic  
 connectivity due to permafrost thaw in the lower Liard River valley, NWT, Canada,  
*Hydrological Processes*, 28, 4163-4178, doi:10.1002/hyp.10206, 2014.
- Coppin, P., Jonckheere, I., Nackaerts, K., Muys, B., and Lambin, E.: Digital change detection  
 methods in ecosystem monitoring: a review, *International Journal of Remote Sensing*,  
 1205 25, 1565-1596, doi:10.1080/0143116031000101675, 2004.
- de Jong, R., Verbesselt, J., Schaepman, M. E., and Bruin, S.: Trend changes in global  
 greening and browning: contribution of short-term trends to longer-term change,  
*Global Change Biology*, 18, 642-655, doi:10.1111/j.1365-2486.2011.02578.x, 2012.
- DeBeer, C. M., Wheeler, H. S., Quinton, W. L., Carey, S. K., Stewart, R. E., Mackay, M. D.,  
 1210 and Marsh, P.: The changing cold regions network: Observation, diagnosis and  
 prediction of environmental change in the Saskatchewan and Mackenzie River Basins,  
 Canada, *Science China: Earth Science*, doi: 10.1007/s11430-014-5001-6,  
 doi:10.1007/s11430-014-5001-6, 2015.
- DeBeer, C. M., Wheeler, H. S., Carey, S. K., and Chun, K. P.: Recent climatic, cryospheric,  
 1215 and hydrological changes over the interior of western Canada: a review and synthesis,  
*Hydrology and Earth System Sciences*, 20, 1573, doi:10.5194/hess-20-1573-2016,  
 2016.



- Déry, S. J., Hernández-Henríquez, M. A., Burford, J. E., and Wood, E. F.: Observational  
 evidence of an intensifying hydrological cycle in northern Canada, *Geophysical*  
 1220 *Research Letters*, 36, doi:10.1029/2009GL038852, 2009a.
- Déry, S. J., Stahl, K., Moore, R. D., Whitfield, P. H., Menounos, B., and Burford, J. E.:  
 Detection of runoff timing changes in pluvial, nival, and glacial rivers of Western  
 Canada, *Water Resources Research*, 45, doi:10.1029/2008WR006975, 2009b.
- Devito, K. J., Creed, I., Gan, T., Mendoza, C., Petrone, R., Silins, U., and Smerdon, B.: A  
 1225 framework for broad-scale classification of hydrologic response units on the Boreal  
 Plain: Is topography the last thing to consider?, *Hydrological Processes*, 19, 1705-  
 1714, doi:10.1002/hyp.5881, 2005.
- Dumanski, S., Pomeroy, J. W., and Westbrook, C. J.: Hydrological regime changes in a  
 Canadian Prairie basin, *Hydrological Processes*, 29, 3893-3904,  
 1230 doi:10.1002/hyp.10567, 2015.
- Eamer, J., Henry, G., Gunn, A., and Harding, L.: Arctic ecozone status and trends assessment.  
 Canadian Biodiversity: Ecosystem Status and Trends 2010, Technical Ecozone  
 Report. Canadian Councils of Resource Ministers, Ottawa, ON. , Ottawa, ON,  
 xii+246, 2014. <http://www.biodivcanada.ca/default.asp?lang=En&n=137E1147-1>
- 1235 Ehsanzadeh, E., van der Kamp, G., and Spence, C.: On the changes in long-term streamflow  
 regimes in the North American Prairies, *Hydrological Sciences*, 61, 64-78,  
 doi:10.1080/02626667.2014.967249, 2016.
- Environment\_Canada: EC Data Explorer V1.2.30, Water Survey of Canada V1.2.30  
 www.canada.ca/en/environment-climate-change/services/water-  
 1240 overview/quantity/monitoring/survey/data-products-services/explorer.html, ,  
 doi:https://www.ec.gc.ca/rhc-wsc/, 2010.
- Fleming, S. W.: Impacts of climatic trends upon groundwater resources, aquifer-stream  
 interactions and aquatic habitat in glacierized watersheds, Yukon Territory, Canada,  
*Glaciology and Earth's Changing Environment*, 1-2, 2007.
- 1245 Fleming, S. W., and Dahlke, H. E.: Modulation of linear and nonlinear hydroclimatic  
 dynamics by mountain glaciers in Canada and Norway: Results from information-



- theoretic polynomial selection, Canadian Water Resources Journal/Revue canadienne des ressources hydriques, 39, 324-341, doi:10.1080/07011784.2014.942164, 2014.
- Fohrer, N., Haverkamp, S., Eckhardt, K., and Frede, H.-G.: Hydrologic response to land use  
 1250 changes on the catchment scale, Physics and Chemistry of the Earth, Part B: Hydrology, Oceans and Atmosphere, 26, 577-582, doi:10.1016/S1464-1909(01)00052-1, 2001.
- Forbes, K. A., Kienzie, S. W., Coburn, C. A., Byrne, J. M., and Rasmussen, J.: Simulating the hydrological response to predicted climate change on a watershed in southern Alberta,  
 1255 Canada, Climatic Change, 105, 555-576, doi:10.1007/s10584-010-9890-x, 2011.
- Forkel, M., Carvalhais, N., Verbesselt, J., Mahecha, M. D., Neigh, C. S. R., and Reichstein, M.: Trend change detection in NDVI time series: Effects of inter-annual variability and methodology, Remote Sensing, 5, 2113-2144, doi:10.3390/rs5052113, 2013.
- Forman, B. A., Reichle, R. H., and Rodell, M.: Assimilation of terrestrial water storage from  
 1260 GRACE in a snow-dominated basin, Water Resources Research, 48, doi:10.1029/2011WR011239, 2012.
- Fyfe, J., and Flato, G. M.: Enhanced climate change and its detection over the Rocky Mountains, Journal of Climate, 12, 230-243, 1999.
- Gan, T. Y.: Hydroclimatic trends and possible climatic warming in the Canadian Prairies,  
 1265 Water Resources Research, 34, 3009-3015, doi:10.1029/98WR01265, 1998.
- Garbrecht, J., Van Liew, M. W., and Brown, G. O.: Trends in precipitation, streamflow, and evapotranspiration in the Great Plains of the United States, Journal of Hydrologic Engineering, 9, 360-367, doi:10.1061/(ASCE)1084-0699(2004)9:5(360), 2004.
- Gerken, T., Bromley, G. T., and Stoy, P. C.: Surface moistening trends in the northern North  
 1270 American Great Plains increase the likelihood of convective initiation, Journal of Hydrometeorology, 19, 227-244, doi:10.1175/JHM-D-17-0117.1, 2018.
- Google\_Earth\_Engine\_Team: Google Earth Engine: A planetary-scale geo-spatial analysis platform, 2017.
- Gorelick, N., Hancher, M., Dixon, M., Ilyushchenko, S., Thau, D., and Moore, R.: Google  
 1275 Earth Engine: Planetary-scale geospatial analysis for everyone, Remote Sensing of Environment, 202, 18-27, doi:10.1016/j.rse.2017.06.031, 2017.



- Groisman, P. Y., Knight, R. W., Heim, R. R., Jr., Razuvaev, V. N., Sherstyukov, B. G.,  
 Speranskaya, N. A., Whitfield, P. H., Tuomenvirta, H., and Alexandersson, H.:  
 Changes in climate potential forest fire danger and land use in high latitudes of the  
 1280 northern hemisphere, Abstract of the paper to the 12th Boreal Forest Research  
 Association International Conference, 3-7 May 2004, Fairbanks, Alaska, 1, 2004.
- Hall, D. K., Riggs, G. A., and Salomonson, V. V.: Development of methods for mapping  
 global snow cover using moderate resolution imaging spectroradiometer data, Remote  
 sensing of Environment, 54, 127-140, doi:10.1016/0034-4257(95)00137-P, 1995.
- 1285 Halverson, M. J., and Fleming, S. W.: Complex network theory, streamflow, and hydrometric  
 monitoring system design, Hydrology and Earth System Sciences, 19, 3301-3318,  
 doi:10.5194/hess-19-3301-2015, 2015.
- Hannaford, J., Buys, G., Stahl, K., and Tallaksen, L. M.: The influence of decadal-scale  
 variability on trends in long European streamflow records, Hydrology and Earth  
 1290 System Sciences, 17, 2717-2733, 2013.
- Hansen, M. C., Potapov, P. V., Moore, R., Hancher, M., Turubanova, S. A. A., Tyukavina,  
 A., Thau, D., Stehman, S. V., Goetz, S. J., and Loveland, T. R.: High-resolution  
 global maps of 21st-century forest cover change, science, 342, 850-853,  
 doi:10.1126/science.1244693, 2013.
- 1295 Harder, P., Pomeroy, J. W., and Westbrook, C. J.: Hydrological resilience of a Canadian  
 Rockies headwaters basin subject to changing climate, extreme weather, and forest  
 management, Hydrological Processes, 29, 3905-3924, doi:10.1002/hyp.10596, 2015.
- Hatcher, K. L., and Jones, J. A.: Climate and streamflow trends in the Columbia River Basin:  
 evidence for ecological and engineering resilience to climate change, Atmosphere-  
 1300 Ocean, 51, 436-455, doi: 10.1080/07055900.2013.808167, 2013.
- Hayashi, M., Van der Kamp, G., and Rosenberry, D. O.: Hydrology of Prairie wetlands:  
 Understanding the integrated surface-water and groundwater processes, Wetlands,  
 doi:10.1007/s13157-016-0797-9, 2016.
- Hewitson, B. C., and Crane, R. G.: Self-organizing maps: applications to synoptic  
 1305 climatology, Climate Research, 22, 13-26, doi:10.3354/cr022013, 2002.



- Hinzman, L. D., Bettez, N. D., Bolton, W. R., Chapin, F. S., Dyurgerov, M. B., Fastie, C. L., Griffith, B., Hollister, R. D., Hope, A., and Huntington, H. P.: Evidence and implications of recent climate change in northern Alaska and other arctic regions, *Climatic Change*, 72, 251-298, doi:10.1007/s10584-005-5352-2, 2005.
- 1310 Hogg, E. H.: Climate and the southern limit of the western Canadian boreal forest, *Canadian Journal Forest Research*, 24, 1835-1845, doi:10.1139/x94-237, 1994.
- Ireson, A. M., Barr, A. G., Johnstone, J. F., Mamet, S. D., van der Kamp, G., Whitfield, C. J., Michel, N. L., North, R. L., Westbrook, C. J., DeBeer, C., Chun, K. P., Nazemi, A., and Sagin, J.: The changing water cycle: the Boreal Plains ecozone of Western  
 1315 Canada, *WIREs Water*, 2, 505-521, doi:10.1002/wat2.1098, 2015.
- Janowicz, R.: Apparent recent trends in hydrologic response in permafrost regions of northwest Canada, *Hydrology Research*, 39, 267-275, doi:10.2166/nh.2008.103, 2008.
- Jost, G., Moore, R. D., Menounos, B., and Wheate, R.: Quantifying the contribution of glacier runoff to streamflow in the upper Columbia River Basin, Canada, *Hydrology and Earth System Sciences*, 16, 849-860, doi:10.5194/hess-16-849-2012, 2012.  
 1320
- Jorgenson, M. T., Frost, G. V., and Dissing, D.: Drivers of landscape changes in coastal ecosystems on the Yukon-Kuskokwim Delta, Alaska, *Remote Sensing*, 10, 1280, doi:10.3390/rs10081280, 2018.
- Kalteh, A. M., Hjorth, P., and Berndtsson, R.: Review of the self-organizing map (SOM) approach in water resources: Analysis, modelling and application, *Environmental Modelling & Software*, 23, 835-845, doi:10.1016/j.envsoft.2007.10.001, 2008.  
 1325
- Kane, D. L.: The impact of hydrologic perturbations on arctic ecosystems induced by climate change, in: *Global change and Arctic Terrestrial Ecosystems*, Springer, 63-81, 1997.
- Keogh, E., and Ratanamahatana, C. A.: Exact indexing of dynamic time warping, *Knowledge and Information Systems*, 7, 358-386, doi:10.1007/s10115-004-0154-9, 2005.  
 1330
- Ketchen, D. J., and Shook, C. L.: The application of cluster analysis in strategic management research: an analysis and critique, *Strategic management journal*, 17, 441-458, doi:10.1002/(SICI)1097-0266(199606)17:6<441::AID-SMJ819>3.0.CO;2-G, 1996.



- Kodinariya, T. M., and Makwana, P. R.: Review on determining number of cluster in k-means clustering, *International Journal of Advance Research in Computer Science and Management Studies*, 1, 90-95, 2013.
- Kohonen, T., and Somervuo, P.: Self-organizing maps of symbol strings, *Neurocomputing*, 21, 19-30, doi:10.1016/S0925-2312(98)00031-9, 1998.
- Krogh, S. A., and Pomeroy, J. W.: Recent changes to the hydrological cycle of an Arctic basin at the tundra–taiga transition, *Hydrology and Earth System Sciences*, 22, 3993-4014, doi:10.5194/hess-22-3993-2018, 2018.
- Lee, E. J., Livino, A., Han, S.-C., Zhang, K., Briscoe, J., Kelman, J., and Moorcroft, P.: Land cover change explains the increasing discharge of the Paraná River, *Regional Environmental Change*, 1-11, doi:10.1007/s10113-018-1321-y, 2018.
- Leith, R. M. M., and Whitfield, P. H.: Evidence of climate change effects on the hydrology of streams in South-central BC, *Canadian Water Resources Journal*, 23, 219-230, doi:10.4296/cwrj2303219, 1998.
- Likas, A., Vlassis, N., and Verbeek, J. J.: The global k-means clustering algorithm, *Pattern recognition*, 36, 451-461, doi:10.1016/S0031-3203(02)00060-2, 2003.
- Liljedahl, A. K., Boike, J., Daanen, R. P., Fedorov, A. N., Frost, G. V., Grosse, G., Hinzman, L. D., Iijma, Y., Jorgenson, J. C., Matveyeva, N., Necsoiu, M., Raynolds, M. K., Romanovsky, V. E., Schulla, J., Tape, K. D., Walker, D. A., Wilson, C. J., Yabuki, H., and Zona, D.: Pan-Arctic ice-wedge degradation in warming permafrost and its influence on tundra hydrology, *Nature Geoscience*, online, doi:10.1038/ngeo2674, 2016.
- Lillesand, T., Kiefer, R. W., and Chipman, J.: Remote sensing and image interpretation, John Wiley & Sons, 2014.
- Luce, C. H.: Effects of climate change on snowpack, glaciers, and water resources in the Northern Rockies, in: *Climate Change and Rocky Mountain Ecosystems*, Springer, 25-36, 2018.
- Luckman, B. T.: Mountain areas and global change: A view from the Canadian Rockies, *Mountain Research and Development*, 10, 183-195, doi:10.2307/3673428, 1990.



- Luckman, B. T.: Landscape and climate change in the central Canadian Rockies during the  
 20th century, *Canadian Geographer*, 42, 319-336, doi:10.1111/j.1541-  
 1365 0064.1998.tb01349.x, 1998.
- Luckman, B. T., and Kavanagh, T.: Impact of climate fluctuations on mountain environments  
 in the Canadian Rockies, *Ambio*, 29, 371-380, doi:10.1579/0044-7447-29.7.371,  
 2000.
- MacCulloch, G., and Whitfield, P. H.: Towards a stream classification system for the  
 1370 Canadian Prairie Provinces, *Canadian Water Resources Journal*, 37, 311-332,  
 doi:10.4296/cwrj2011-905, 2012.
- Marshall, I. B., Schut, P., and Ballard, M.: A national ecological framework for Canada:  
 attribute data. Environmental Quality Branch, Ecosystems Science Directorate,  
 Environment Canada and Research Branch, Agriculture and Agri-Food Canada,  
 1375 Ottawa, 1999.
- McKenna, O. P., Mushet, D. M., Rosenberry, D. O., and LaBaugh, J. W.: Evidence for a  
 climate-induced ecohydrological state shift in wetland ecosystems of the southern  
 Prairie Pothole Region, *Climatic Change*, 145, 273-287, doi:10.1007/s10584-017-  
 2097-7, 2017.
- 1380 McLeod, A. I.: Kendall rank correlation and Mann-Kendall trend test Package ‘Kendall’,  
 http://www.stats.uwo.ca/faculty/aim, 12, 2015.
- Mekis, E., Stewart, R. E., Theriault, J. M., Kochtubajda, B., Bonsal, B. R., and Liu, Z.: Near-  
 0° C surface temperature and precipitation type patterns across Canada, *Hydrology  
 and Earth System Sciences*, 24, 1741-1741, 2020.
- 1385 Militino, A. F., Ugarte, M. D., and Pérez-Goya, U.: Detecting change-points in the time series  
 of surfaces occupied by pre-defined NDVI categories in continental Spain from 1981  
 to 2015, in: *The Mathematics of the Uncertain*, Springer, 295-307, 2018.
- Millett, B., Johnson, W. C., and Guntenspergen, G.: Climate trends of the North American  
 prairie pothole region 1906–2000, *Climatic Change*, 93, 243-267,  
 1390 doi:10.1007/s10584-008-9543-5, 2009.





- Morey, L. C., and Agresti, A.: The measurement of classification agreement: An adjustment to the Rand statistic for chance agreement, *Educational and Psychological Measurement*, 44, 33-37, 1985.
- 1395 Patterson, L. A., Lutz, B., and Doyle, M. W.: Streamflow changes in the South Atlantic, United States during the mid-and late 20th Century, *JAWRA Journal of the American Water Resources Association*, 48, 1126-1138, doi:10.1111/j.1752-1688.2012.00674.x, 2012.
- Pekel, J.-F., Cottam, N., and Belward, A. S.: High-resolution mapping of global surface water and its long-term changes, *Nature*, 540, 418-422, doi:doi:10.1038/nature20584., 2016.
- 1400 Peterson, T. C., Taylor, M. A., Demeritte, R., Duncombe, D. L., Burton, S., Thompson, F., Porter, A., Mercedes, M., Villegas, E., Semexant Fils, R., Klein Tank, A., Martis, A., Warner, R., Joyette, A., Mills, W., Alexander, L., and Gleason, B.: Recent changes in climate extremes in the Caribbean region, *Journal of Geophysical Research*, 107, D21,4601, doi:4610.1029/2002JD002251, doi:10.1029/2002JD002251, 2002.
- 1405 Philipsen, L. J., Gill, K. M., Shepherd, A., and Rood, S. B.: Climate change and hydrology at the prairie margin: Historic and prospective future flows of Canada's Red Deer and other Rocky Mountain rivers, *Hydrological Processes*, doi:10.1002/hyp.13180, 2018.
- Potter, C., Li, S., and Crabtree, R.: Changes in Alaskan tundra ecosystems estimated from MODIS greenness trends, 2000 to 2010, *Journal of Geophysics & Remote Sensing*, 2, 2169-0049.1000107, doi:10.4172/2169-0049.1000107, 2013.
- 1410 Price, D. T., Alfaro, R. I., Brown, K. J., Flannigan, M. D., Fleming, R. A., Hogg, E. H., Girardin, M. P., Lakusta, T., Johnston, M., McKenney, D. W., Pedlar, J. H., Stratton, T., Sturrock, R. N., Thompson, I. D., Trofymow, J. A., and Venier, L. A.: Anticipating the consequences of climate change for Canada's boreal forest ecosystems, *Environmental Reviews*, 21, 322-365, doi:10.1139/er-2013-0042, 2013.
- 1415 Quinton, W. L., Berg, A. A., Carpino, O., Connon, R. F., Craig, J. R., Devoie, E., and Johnson, E.: Toward understanding the trajectory of hydrological change in the southern Taiga Plains, northeastern British Columbia and southwestern Northwest Territories, 77-86, 2018.



- 1420 R\_Development\_Core\_Team: R: A language and environment for statistical computing, R  
 Foundation for Statistical Computing, Vienna, Austria, 2014.
- Razavi, T., and Coulibaly, P.: Classification of Ontario watersheds based on physical  
 attributes and streamflow series, *Journal of Hydrology*, 493, 81-94,  
 doi:10.1016/j.jhydrol.2013.04.013, 2013.
- 1425 Rodell, M., Famiglietti, J. S., Wiese, D. N., Reager, J. T., Beaudoing, H. K., Landerer, F. W.,  
 and Lo, M.-H.: Emerging trends in global freshwater availability, *Nature*, 557, 1,  
 doi:10.1038/s41586-018-0123-1, 2018.
- Rood, S. B., and Samuelson, G. M.: Twentieth century decline in streamflow from Alberta's  
 Rocky Mountains, in: *The Science, Impacts and Monitoring of Drought in Western*  
 1430 *Canada*, edited by: Khandekar, M. L., Sauchyn, D. J., and Garnett, E. R., 49-55, 2005.
- Rood, S. B., Kaluthota, S., Philipsen, L. J., Rood, N. J., and Zanewich, K. P.: Increasing  
 discharge from the Mackenzie River system to the Arctic Ocean, *Hydrological*  
*Processes*, 31, 150-160, doi:10.1002/hyp.10986, 2017.
- Rosenberg, N. J.: Climate of the Great Plains region of The United States, *Great Plains*  
 1435 *Quarterly*, 7, 22-32, 1987.
- Ryberg, K. R., Akyüz, F. A., Wiche, G. J., and Lin, W.: Changes in seasonality and timing of  
 peak streamflow in snow and semi-arid climates of the North-Central United States,  
 1910-2012, *Hydrological Processes*, 30, 1208-1218, doi:10.1002/hyp.10693, 2015.
- Sarda-Espinosa, A.: Time series clustering along with optimizations for the dynamic time  
 1440 warping distance. Package 'dtwclust' [https://cran.r-](https://cran.r-project.org/web/packages/dtwclust/dtwclust.pdf)  
[project.org/web/packages/dtwclust/dtwclust.pdf](https://cran.r-project.org/web/packages/dtwclust/dtwclust.pdf), 73, 2017.
- Sarda-Espinosa, A.: Package 'dtwclust' [https://cran.r-](https://cran.r-project.org/web/packages/dtwclust/dtwclust.pdf)  
[project.org/web/packages/dtwclust/dtwclust.pdf](https://cran.r-project.org/web/packages/dtwclust/dtwclust.pdf): [https://cran.r-](https://cran.r-project.org/web/packages/dtwclust/dtwclust.pdf)  
[project.org/web/packages/dtwclust/dtwclust.pdf](https://cran.r-project.org/web/packages/dtwclust/dtwclust.pdf), 2018.
- 1445 Schnorbus, M., Werner, A. T., and Bennett, K. E.: Impacts of climate change in three  
 hydrologic regimes in British Columbia, Canada, *Hydrological Processes*, 28, 1170-  
 1189, doi:10.1002/hyp.9661, 2014.
- Seager, R., Lis, N., Feldman, J., Ting, M., Williams, A. P., Nakamura, J., Liu, H., and  
 Henderson, N.: Whither the 100th Meridian? The once and future physical and human



- 1450 geography of America's arid-humid divide: Part I: The story so far, *Earth Interactions*,  
 doi:10.1175/EI-D-17-0011.1, 2018a.
- Seager, R., Feldman, J., Lis, N., Ting, M., Williams, A. P., Nakamura, J., Liu, H., and  
 Henderson, N.: Whither the 100th Meridian? The once and future physical and human  
 geography of America's arid-humid divide: Part II: The meridian moves east, *Earth*  
 1455 *Interactions*, doi:10.1175/EI-D-17-0012.1, 2018b.
- Shook, K. R., and Pomeroy, J. W.: Changes in the hydrological character of rainfall on the  
 Canadian prairies, *Hydrological Processes*, 26, 1752-1766, doi:10.1002/hyp.9383,  
 2012.
- Soulard, C. E., Albano, C. M., Villarreal, M. L., and Walker, J. J.: Continuous 1985–2012  
 1460 Landsat monitoring to assess fire effects on meadows in Yosemite National Park,  
 California, *Remote Sensing*, 8, 371, doi:10.3390/rs8050371, 2016.
- St. Jacques, J.-M., and Sauchyn, D. J.: Increasing winter baseflow and mean annual  
 streamflow from possible permafrost thawing in the Northwest Territories, Canada,  
*Geophysical Research Letters*, 36, doi:10.1029/2008GL035822, 2009.
- 1465 Steinley, D.: K-means clustering: A half-century synthesis, *British Journal of Mathematical*  
 and *Statistical Psychology*, 59, 1-34, doi:10.1348/000711005X48266, 2006.
- Su, Z.: Remote sensing of land use and vegetation for mesoscale hydrological studies,  
*International Journal of Remote Sensing*, 21, 213-233,  
 doi:10.1080/014311600210803, 2000.
- 1470 Tan, X., and Gan, T. Y.: Contribution of human and climate change impacts to changes in  
 streamflow of Canada, *Nature Scientific Reports*, online, doi:10.1038/srep17767,  
 2015.
- Tan, X., Gan, T. Y., and Chen, Y. D.: Moisture sources and pathways associated with the  
 spatial variability of seasonal extreme precipitation over Canada, *Climate Dynamics*,  
 1475 1-12, doi:10.1007/s00382-017-3630-0, 2017.
- Ternynck, C., Ben Alaya, M. A., Chebana, F., Dabo-Niang, S., and Ouarda, T. M. B. J.:  
 Streamflow hydrograph classification using functional data analysis, *Journal of*  
*Hydrometeorology*, 17, 327-344, doi:10.1175/JHM-D-14-0200.1, 2016.



- Thorne, R., and Woo, M.-K.: Streamflow response to climatic variability in a complex  
 1480 mountainous environment: Fraser River Basin, British Columbia, Canada,  
 Hydrological Processes, 25, 3076-3085, doi:10.1002/hyp.8225, 2011.
- USGS, and NOAA: Landsat 4 Data Users Handbook, Department of Interior, 1984.
- van der Kamp, G., Keir, D., and Evans, M. S.: Long-term water level changes in closed-  
 basins of the Canadian Prairies, Canadian Water Resources Journal, 33, 23-38,  
 1485 doi:10.4296/cwrj3301023, 2008.
- van Hulle, M. M.: Self-organizing maps, in: Handbook of Natural Computing, Springer  
 Berlin Heidelberg DE, 585-622, 2012.
- Verbesselt, J., Hyndman, R. J., Newnham, G., and Culvenor, D.: Detecting trend and seasonal  
 changes in satellite image time series, Remote Sensing of Environment, 114, 106-115,  
 1490 doi:10.1016/j.rse.2009.08.014, 2010.
- Verbesselt, J., Zeileis, A., and Herold, M.: Near real-time disturbance detection using satellite  
 image time series, Remote Sensing of Environment, 123, 98-108,  
 doi:10.1016/j.rse.2012.02.022, 2012.
- Vincent, L. A., Zhang, X., Brown, R. D., Feng, Y., Mekis, E., Milewska, E. J., Wan, H., and  
 1495 Wang, X. L.: Observed trends in Canada's climate and influence of low-frequency  
 variability modes, Journal of Climate, 28, 4545-4560, 2015.
- Vincent, L., Zhang, X., Mekis, É., Wan, H., and Bush, E.: Changes in Canada's climate:  
 Trends in indices based on daily temperature and precipitation data, Atmosphere-  
 Ocean, 56, 332-349, doi: 10.1080/07055900.2018.1514579, 2018.
- 1500 Wang, K., and Gasser, T.: Alignment of curves by dynamic time warping, The Annals of  
 Statistics, 25, 1251-1276, doi:10.1214/aos/1069362747, 1997.
- Westmacott, J. R., and Burn, D. H.: Climate change effects on the hydrologic regime within  
 the Churchill-Nelson River Basin, Journal of Hydrology, 202, 263-279,  
 doi:10.1016/S0022-1694(97)00073-5, 1997.
- 1505 Whitfield, P. H.: Reporting scale and the information content of streamflow data, Northwest  
 Science, 72, 42-51, 1998.



- Whitfield, P. H., and Cannon, A. J.: Recent variations in climate and hydrology in Canada,  
 Canadian Water Resources Journal 25, 19-65, doi:10.4296/cwrj2501019, 2000.
- Whitfield, P. H., Bodtker, K., and Cannon, A. J.: Recent variations in seasonality of  
 1510 temperature and precipitation in Canada, 1976-95, International Journal of  
 Climatology, 22, 1617-1644, doi:10.1002/joc.813, 2002.
- Whitfield, P. H., Hall, A. W., and Cannon, A. J.: Changes in the seasonal cycle in the  
 circumpolar Arctic, 1976-95: temperature and precipitation, Arctic 57, 80-93,  
 doi:10.14430/arctic485, 2004.
- 1515 Whitfield, P. H., and Pomeroy, J. W.: Changes to flood peaks of a mountain river:  
 implications for analysis of the 2013 flood in the Upper Bow River, Canada,  
 Hydrological Processes, 30, 4657-4673, doi:10.1002/hyp.10957, 2016.
- Whitfield, P. H., and Pomeroy, J. W.: Assessing the quality of the streamflow record for a  
 long-term reference hydrometric station: Bow River at Banff, Canadian Water  
 1520 Resources Journal/Revue canadienne des ressources hydriques, 42, 391-415,  
 doi:10.1080/07011784.2017.1399086, 2017.
- Whitfield, P. H., Shook, K. R., and Pomeroy, J. W.: Spatial patterns of temporal changes in  
 Canadian Prairie hydrology using an alternative trend assessment approach, Journal of  
 Hydrology, doi:10.1016/j.jhydrol.2020.124541, 2020.
- 1525 Winter, T. C., and Rosenberry, D. O.: Hydrology of prairie pothole wetlands during drought  
 and deluge: a 17-year study of the Cottonwood Lake wetland complex in North  
 Dakota in the perspective of longer term measured and proxy hydrological records,  
 Climatic Change, 40, 189-209, doi:10.1023/A:1005448416571, 1998.
- Woo, M.-K., and Thorne, R.: Comment on ‘Detection of hydrologic trends and variability’ by  
 1530 Burn, D.H. and Hag Elnur, M.A., 2002. Journal of Hydrology 255, 107–122, Journal  
 of Hydrology, 277, 150-160, doi:10.1016/S0022-1694(03)00079-9, 2003.
- Woo, M.-K., Marsh, P., and Pomeroy, J. W.: Snow, frozen soils and permafrost hydrology in  
 Canada, 1995-1998, Hydrological Processes, 14, 1591-1611, doi: 10.1002/1099-  
 1085(20000630)14:9<1591::AID-HYP78>3.0.CO;2-W, 2000.
- 1535 Woo, M.-K., Thorne, R., Szeto, K., and Yang, D.: Streamflow hydrology in the boreal region  
 under the influences of climate and human interference, Philosophical Transactions of

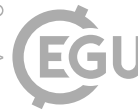

the Royal Society B: Biological Sciences, 363, 2249-2258,  
doi:10.1098/rstb.2007.2197, 2008.

1540 Zhang, X., Harvey, K. D., Hogg, W. D., and Yuzyk, T. R.: Trends in Canadian streamflow,  
Water Resources Research 37, 987-998, doi:10.1029/2000WR900357, 2001.

Zhu, Z., Wang, S., and Woodcock, C. E.: Improvement and expansion of the Fmask  
algorithm: Cloud, cloud shadow, and snow detection for Landsats 4–7, 8, and Sentinel  
2 images, Remote Sensing of Environment, 159, 269-277,  
doi:10.1016/j.rse.2014.12.014, 2015.

1545

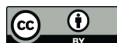

Table 1. Hydrometric stations included in the analysis. Only stations that are in these three basins were considered; to be included they needed to be designated as having natural streamflow, active, and have more than 30 years of record. The three other hydrometric stations were associated with a Changing Cold Regions Network Water, Ecosystem, Cryosphere, and Climate (WECC) Observatory with the number of years of record shown in parenthesis.

| Drainage Basin               | Water<br>Survey<br>Basin Code | Continuous | Seasonal | Other<br>Continuous | Other<br>Seasonal |
|------------------------------|-------------------------------|------------|----------|---------------------|-------------------|
| <i>Nelson River Basin</i>    |                               |            |          |                     |                   |
| Saskatchewan                 | 05A-05K                       | 29         | 98       |                     | 05BF016 (50)      |
| Assiniboine, Red,<br>Nelson  | 05L-05U                       | 30         | 77       |                     | 05ME007 (37)      |
| <i>Mackenzie River Basin</i> |                               |            |          |                     |                   |
| Athabasca                    | 07A-07D                       | 22         | 30       |                     |                   |
| Peace                        | 07E-07K                       | 30         | 22       |                     |                   |
| Slave                        | 07L-07W                       | 13         | 4        |                     |                   |
| Liard                        | 10A-10E                       | 22         | 1        | 10ED009 (17)        |                   |
| Mackenzie                    | 10f-10N                       | 16         | 0        |                     |                   |
|                              |                               | 161        | 231      | 1                   | 2                 |



Table 2. Look-up table of five-day periods during the annual common time window.

| 5-day period # | Starting Date |
|----------------|---------------|
| 22             | 16-Apr        |
| 23             | 21-Apr        |
| 24             | 26-Apr        |
| 25             | 01-May        |
| 26             | 06-May        |
| 27             | 11-May        |
| 28             | 16-May        |
| 29             | 21-May        |
| 30             | 26-May        |
| 31             | 31-May        |
| 32             | 05-Jun        |
| 33             | 10-Jun        |
| 34             | 15-Jun        |
| 35             | 20-Jun        |
| 36             | 25-Jun        |
| 37             | 30-Jun        |
| 38             | 05-Jul        |
| 39             | 10-Jul        |
| 40             | 15-Jul        |
| 41             | 20-Jul        |
| 42             | 25-Jul        |
| 43             | 30-Jul        |
| 44             | 04-Aug        |
| 45             | 09-Aug        |
| 46             | 14-Aug        |
| 47             | 19-Aug        |
| 48             | 24-Aug        |
| 49             | 29-Aug        |
| 50             | 03-Sep        |
| 51             | 08-Sep        |
| 52             | 13-Sep        |
| 53             | 18-Sep        |
| 54             | 23-Sep        |
| 55             | 28-Sep        |
| 56             | 03-Oct        |
| 57             | 08-Oct        |
| 58             | 13-Oct        |
| 59             | 18-Oct        |
| 60             | 23-Oct        |
| 61             | 28-Oct        |
| 62             | 02-Nov        |

1555





Table 3. Streamflow Regime Type classification in relation to the ecozone in which the station is located.

| Ecozone            | Streamflow Regime Type |    |    |    |     |   |   |   |   |    |    |    | n   |
|--------------------|------------------------|----|----|----|-----|---|---|---|---|----|----|----|-----|
|                    | 1                      | 2  | 3  | 4  | 5   | 6 | 7 | 8 | 9 | 10 | 11 | 12 |     |
| Southern Arctic    |                        | 1  |    |    |     |   |   |   |   |    |    |    | 1   |
| Taiga Plains       | 5                      | 3  |    |    | 9   |   |   |   | 1 |    | 5  | 1  | 24  |
| Taiga Shield       | 1                      |    |    | 2  | 1   |   |   |   | 3 |    |    |    | 7   |
| Boreal Shield      | 13                     |    | 2  | 2  | 6   |   |   |   | 1 |    | 3  |    | 27  |
| Boreal Plains      | 31                     | 28 | 17 | 1  | 81  | 1 | 1 |   |   |    |    |    | 160 |
| Prairies           | 11                     | 53 | 3  |    | 49  |   |   | 1 |   | 2  |    |    | 119 |
| Montane Cordillera | 31                     |    |    | 5  | 2   |   |   |   |   |    |    |    | 38  |
| Boreal Cordillera  | 11                     |    |    |    |     |   |   |   |   |    |    | 2  | 13  |
| Taiga Cordillera   | 1                      |    |    |    |     |   |   |   |   |    | 1  | 1  | 3   |
| Hudson Plains      |                        |    |    |    |     |   |   |   |   |    | 3  |    | 3   |
| <i>n</i>           | 104                    | 85 | 22 | 10 | 148 | 1 | 1 | 1 | 5 | 2  | 12 | 4  | 395 |



1560 Table 4. Summary of recession slopes amongst the twelve Streamflow Regime Types. Units are z-score/length  
 estimated from Figure 8. Types with \* have only one member and are excluded here.

| <b>Streamflow<br/>Regime<br/>Type</b> | <b>Recession<br/>slope 1</b> | <b>Recession<br/>slope 2</b> | <b>Recession<br/>slope 3</b> |
|---------------------------------------|------------------------------|------------------------------|------------------------------|
| 1                                     | -0.22                        | -0.04                        | NA                           |
| 2                                     | Nonlinear                    |                              |                              |
| 3                                     |                              | -0.04                        |                              |
| 4                                     |                              | -0.06                        |                              |
| 5                                     |                              | -0.06                        | 0.00                         |
| 6*                                    |                              |                              |                              |
| 7*                                    |                              |                              |                              |
| 8*                                    |                              |                              |                              |
| 9                                     | -0.04                        | NA                           | NA                           |
| 10                                    | -0.06                        | NA                           | NA                           |
| 11                                    | -0.22                        | 0.00                         | -0.04                        |
| 12                                    | -0.06                        | NA                           | NA                           |



1565 Table 5. Trend patterns for 395 stations against their Streamflow Regime Type classification.

|           | Trend Pattern |          |          |          |          |          | <i>n</i>   |
|-----------|---------------|----------|----------|----------|----------|----------|------------|
|           | <b>1</b>      | <b>2</b> | <b>3</b> | <b>4</b> | <b>5</b> | <b>6</b> |            |
| <b>1</b>  | 1             | 2        | 5        | 13       | 75       | 8        | <b>104</b> |
| <b>2</b>  | 9             | 10       | 10       | 16       | 39       | 1        | <b>85</b>  |
| <b>3</b>  |               |          | 2        | 2        | 17       | 1        | <b>22</b>  |
| <b>4</b>  |               |          |          | 1        | 9        |          | <b>10</b>  |
| <b>5</b>  | 6             | 10       | 13       | 17       | 101      | 1        | <b>148</b> |
| <b>6</b>  |               |          |          | 1        |          |          | <b>1</b>   |
| <b>7</b>  |               |          |          |          | 1        |          | <b>1</b>   |
| <b>8</b>  |               |          | 1        |          |          |          | <b>1</b>   |
| <b>9</b>  | 1             |          | 1        |          | 3        |          | <b>5</b>   |
| <b>10</b> | 2             |          |          |          |          |          | <b>2</b>   |
| <b>11</b> |               |          |          |          | 8        | 4        | <b>12</b>  |
| <b>12</b> |               |          |          |          | 1        | 3        | <b>4</b>   |
| <i>n</i>  | 19            | 22       | 32       | 50       | 254      | 18       | 395        |



Table 6. Trend Patterns in relation to the ecozone in which the station is located.

| Ecozone            | Trend Pattern |    |    |    |     |    | <i>n</i> |
|--------------------|---------------|----|----|----|-----|----|----------|
|                    | 1             | 2  | 3  | 4  | 5   | 6  |          |
| Southern Arctic    |               |    |    |    |     | 1  | 1        |
| Taiga Plains       | 1             | 2  |    | 1  | 13  | 7  | 24       |
| Taiga Shield       | 1             |    | 1  |    | 4   | 1  | 7        |
| Boreal Shield      |               | 1  | 1  | 3  | 21  | 1  | 27       |
| Boreal Plains      | 3             | 9  | 21 | 13 | 114 |    | 160      |
| Prairies           | 14            | 10 | 7  | 29 | 58  | 1  | 119      |
| Montane Cordillera |               |    | 2  | 4  | 32  |    | 38       |
| Boreal Cordillera  |               |    |    |    | 9   | 4  | 13       |
| Taiga Cordillera   |               |    |    |    |     | 3  | 3        |
| Hudson Plains      |               |    |    |    | 3   |    | 3        |
| <i>n</i>           | 19            | 22 | 32 | 50 | 254 | 18 | 395      |

1570



Table 7. Trends in satellite indices in relation to Streamflow Regime Type. The numbers are the fraction of stations showing a trend; values greater than 0.05 are in bold.

| <i>All Changes</i> | <i>Stations</i> | NDVI<br>max | NDVI<br>mean | NDVI<br>min | NDWI<br>max | NDWI<br>mean | NDWI<br>min | NDSI<br>max | NDSI<br>mean | NDSI<br>min |
|--------------------|-----------------|-------------|--------------|-------------|-------------|--------------|-------------|-------------|--------------|-------------|
| 1                  | 99              | <b>0.15</b> | <b>0.09</b>  | <b>0.10</b> | 0.03        | <b>0.07</b>  | <b>0.15</b> | 0.03        | <b>0.07</b>  | <b>0.16</b> |
| 2                  | 79              | <b>0.22</b> | 0.03         | <b>0.18</b> | <b>0.05</b> | <b>0.14</b>  | <b>0.15</b> | <b>0.06</b> | 0.04         | <b>0.06</b> |
| 3                  | 21              | <b>0.14</b> | 0.05         | <b>0.10</b> | 0.05        | <b>0.10</b>  | <b>0.29</b> | 0.05        | 0.00         | <b>0.29</b> |
| 4                  | 10              | 0.00        | 0.00         | <b>0.30</b> | 0.00        | <b>0.10</b>  | <b>0.40</b> | 0.00        | <b>0.10</b>  | <b>0.20</b> |
| 5                  | 142             | <b>0.19</b> | 0.04         | <b>0.11</b> | <b>0.06</b> | <b>0.10</b>  | <b>0.18</b> | <b>0.08</b> | 0.03         | <b>0.09</b> |
| 6                  | 1               | 0.00        | 0.00         | 0.00        | 0.00        | 0.00         | 0.00        | 0.00        | 0.00         | 0.00        |
| 7                  | 1               | 0.00        | 0.00         | 0.00        | 0.00        | 0.00         | 0.00        | 0.00        | 0.00         | 0.00        |
| 8                  | 0               |             |              |             |             |              |             |             |              |             |
| 9                  | 5               | <b>0.20</b> | <b>0.40</b>  | 0.00        | <b>0.20</b> | <b>0.40</b>  | <b>0.20</b> | <b>0.20</b> | <b>0.40</b>  | <b>0.20</b> |
| 10                 | 2               | <b>0.50</b> | 0.00         | 0.00        | 0.00        | 0.00         | 0.00        | 0.00        | 0.00         | <b>0.50</b> |
| 11                 | 12              | 0.00        | <b>0.42</b>  | <b>0.25</b> | <b>0.25</b> | <b>0.42</b>  | <b>0.25</b> | <b>0.17</b> | <b>0.42</b>  | <b>0.25</b> |
| 12                 | 3               | 0.00        | <b>0.67</b>  | <b>0.33</b> | <b>0.33</b> | <b>0.33</b>  | <b>0.33</b> | <b>0.33</b> | <b>0.33</b>  | <b>0.33</b> |
| <i>Decreases</i>   |                 |             |              |             |             |              |             |             |              |             |
| 1                  | 99              | <b>0.05</b> | 0.03         | 0.04        | 0.02        | <b>0.05</b>  | <b>0.08</b> | 0.02        | <b>0.07</b>  | <b>0.08</b> |
| 2                  | 79              | 0.03        | 0.01         | <b>0.18</b> | 0.00        | 0.00         | 0.00        | 0.00        | 0.00         | 0.01        |
| 3                  | 21              | <b>0.14</b> | 0.00         | 0.05        | 0.00        | <b>0.05</b>  | <b>0.14</b> | 0.00        | 0.00         | <b>0.10</b> |
| 4                  | 10              | 0.00        | 0.00         | <b>0.10</b> | 0.00        | <b>0.10</b>  | <b>0.30</b> | 0.00        | <b>0.10</b>  | <b>0.10</b> |
| 5                  | 142             | <b>0.13</b> | 0.02         | <b>0.09</b> | 0.01        | 0.01         | <b>0.09</b> | 0.01        | 0.00         | 0.05        |
| 6                  | 1               | 0.00        | 0.00         | 0.00        | 0.00        | 0.00         | 0.00        | 0.00        | 0.00         | 0.00        |
| 7                  | 1               | 0.00        | 0.00         | 0.00        | 0.00        | 0.00         | 0.00        | 0.00        | 0.00         | 0.00        |
| 8                  | 0               |             |              |             |             |              |             |             |              |             |
| 9                  | 5               | <b>0.20</b> | 0.00         | 0.00        | <b>0.20</b> | <b>0.40</b>  | <b>0.20</b> | <b>0.20</b> | <b>0.40</b>  | <b>0.20</b> |
| 10                 | 2               | <b>0.50</b> | 0.00         | 0.00        | 0.00        | 0.00         | 0.00        | 0.00        | 0.00         | 0.00        |
| 11                 | 12              | 0.00        | 0.00         | 0.00        | <b>0.25</b> | <b>0.42</b>  | <b>0.08</b> | <b>0.17</b> | <b>0.42</b>  | <b>0.08</b> |
| 12                 | 3               | 0.00        | 0.00         | 0.00        | <b>0.33</b> | <b>0.33</b>  | 0.00        | <b>0.33</b> | <b>0.33</b>  | 0.00        |
| <i>Increases</i>   |                 |             |              |             |             |              |             |             |              |             |
| 1                  | 99              | <b>0.10</b> | <b>0.06</b>  | <b>0.06</b> | 0.01        | 0.02         | <b>0.07</b> | 0.01        | 0.00         | <b>0.08</b> |
| 2                  | 79              | <b>0.19</b> | 0.01         | 0.00        | <b>0.05</b> | <b>0.14</b>  | <b>0.15</b> | <b>0.06</b> | 0.04         | <b>0.05</b> |
| 3                  | 21              | 0.00        | 0.05         | 0.05        | <b>0.05</b> | <b>0.05</b>  | <b>0.14</b> | 0.05        | 0.00         | <b>0.19</b> |
| 4                  | 10              | 0.00        | 0.00         | <b>0.20</b> | 0.00        | 0.00         | <b>0.10</b> | 0.00        | 0.00         | <b>0.10</b> |
| 5                  | 142             | <b>0.06</b> | 0.01         | 0.01        | <b>0.05</b> | <b>0.08</b>  | <b>0.09</b> | <b>0.07</b> | 0.03         | 0.04        |
| 6                  | 1               | 0.00        | 0.00         | 0.00        | 0.00        | 0.00         | 0.00        | 0.00        | 0.00         | 0.00        |
| 7                  | 1               | 0.00        | 0.00         | 0.00        | 0.00        | 0.00         | 0.00        | 0.00        | 0.00         | 0.00        |
| 8                  | 0               |             |              |             |             |              |             |             |              |             |
| 9                  | 5               | 0.00        | <b>0.40</b>  | 0.00        | 0.00        | 0.00         | 0.00        | 0.00        | 0.00         | 0.00        |
| 10                 | 2               | 0.00        | 0.00         | 0.00        | 0.00        | 0.00         | 0.00        | 0.00        | 0.00         | <b>0.50</b> |
| 11                 | 12              | 0.00        | <b>0.42</b>  | <b>0.25</b> | 0.00        | 0.00         | <b>0.17</b> | 0.00        | 0.00         | <b>0.17</b> |
| 12                 | 3               | 0.00        | <b>0.67</b>  | <b>0.33</b> | 0.00        | 0.00         | <b>0.33</b> | 0.00        | 0.00         | <b>0.33</b> |



Table 8. Changes in satellite indices by Trend Pattern. The numbers are the fraction of stations showing a trend;  
 1575 values greater than 0.05 are in bold.

| <i>All<br/>changes</i> | <i>Stations</i> | <i>NDVI max</i> | <i>NDVI<br/>mean</i> | <i>NDVI<br/>min</i> | <i>NDWI<br/>max</i> | <i>NDWI<br/>mean</i> | <i>NDWI<br/>min</i> | <i>NDSI<br/>max</i> | <i>NDSI<br/>mean</i> | <i>NDSI<br/>min</i> |
|------------------------|-----------------|-----------------|----------------------|---------------------|---------------------|----------------------|---------------------|---------------------|----------------------|---------------------|
| 1                      | 17              | <b>0.18</b>     | <b>0.12</b>          | <b>0.29</b>         | <b>0.12</b>         | <b>0.18</b>          | <b>0.18</b>         | <b>0.12</b>         | <b>0.06</b>          | <b>0.18</b>         |
| 2                      | 22              | <b>0.36</b>     | 0.00                 | <b>0.23</b>         | 0.05                | <b>0.14</b>          | <b>0.09</b>         | <b>0.14</b>         | <b>0.09</b>          | <b>0.09</b>         |
| 3                      | 30              | 0.00            | 0.00                 | <b>0.07</b>         | <b>0.10</b>         | <b>0.07</b>          | 0.03                | <b>0.13</b>         | 0.03                 | 0.03                |
| 4                      | 47              | <b>0.36</b>     | <b>0.09</b>          | <b>0.15</b>         | <b>0.09</b>         | <b>0.15</b>          | <b>0.21</b>         | <b>0.09</b>         | <b>0.06</b>          | 0.04                |
| 5                      | 243             | <b>0.14</b>     | <b>0.05</b>          | <b>0.10</b>         | 0.05                | <b>0.09</b>          | <b>0.21</b>         | 0.04                | 0.04                 | <b>0.15</b>         |
| 6                      | 16              | <b>0.06</b>     | <b>0.44</b>          | <b>0.25</b>         | <b>0.06</b>         | <b>0.38</b>          | <b>0.06</b>         | <b>0.06</b>         | <b>0.38</b>          | <b>0.25</b>         |
| <i>Decreases</i>       |                 |                 |                      |                     |                     |                      |                     |                     |                      |                     |
| 1                      | 17              | <b>0.12</b>     | 0.00                 | <b>0.29</b>         | <b>0.12</b>         | <b>0.06</b>          | 0.00                | <b>0.12</b>         | <b>0.06</b>          | 0.00                |
| 2                      | 22              | <b>0.14</b>     | 0.00                 | <b>0.23</b>         | 0.00                | 0.00                 | 0.05                | 0.00                | 0.05                 | 0.05                |
| 3                      | 30              | 0.00            | 0.00                 | <b>0.07</b>         | 0.00                | 0.00                 | 0.00                | 0.00                | 0.00                 | 0.00                |
| 4                      | 47              | <b>0.06</b>     | 0.00                 | <b>0.09</b>         | 0.02                | 0.02                 | 0.02                | 0.02                | 0.02                 | 0.04                |
| 5                      | 243             | <b>0.09</b>     | 0.03                 | <b>0.07</b>         | 0.02                | 0.04                 | <b>0.11</b>         | 0.01                | 0.03                 | <b>0.07</b>         |
| 6                      | 16              | 0.00            | 0.00                 | <b>0.06</b>         | <b>0.06</b>         | <b>0.38</b>          | 0.00                | <b>0.06</b>         | <b>0.38</b>          | 0.00                |
| <i>Increases</i>       |                 |                 |                      |                     |                     |                      |                     |                     |                      |                     |
| 1                      | 17              | <b>0.06</b>     | <b>0.12</b>          | 0.00                | 0.00                | <b>0.12</b>          | <b>0.18</b>         | 0.00                | 0.00                 | <b>0.18</b>         |
| 2                      | 22              | <b>0.23</b>     | 0.00                 | 0.00                | 0.05                | <b>0.14</b>          | 0.05                | <b>0.14</b>         | 0.05                 | 0.05                |
| 3                      | 30              | 0.00            | 0.00                 | 0.00                | <b>0.10</b>         | <b>0.07</b>          | 0.03                | <b>0.13</b>         | 0.03                 | 0.03                |
| 4                      | 47              | <b>0.30</b>     | <b>0.09</b>          | <b>0.06</b>         | <b>0.06</b>         | <b>0.13</b>          | <b>0.19</b>         | <b>0.06</b>         | 0.04                 | 0.00                |
| 5                      | 243             | <b>0.05</b>     | 0.02                 | 0.04                | 0.02                | <b>0.05</b>          | <b>0.10</b>         | 0.03                | 0.01                 | <b>0.07</b>         |
| 6                      | 16              | <b>0.06</b>     | <b>0.44</b>          | <b>0.19</b>         | 0.00                | 0.00                 | <b>0.06</b>         | 0.00                | 0.00                 | <b>0.25</b>         |

375



Table 9. Changes in satellite indices in relation to Ecozones. The numbers are the fraction of stations showing a trend; values greater than 0.05 are in bold.

|                       |                 | NDVI | NDVI | NDVI | NDWI | NDWI | NDWI | NDSI | NDSI | NDSI |
|-----------------------|-----------------|------|------|------|------|------|------|------|------|------|
| <i>All changes</i>    | <i>Stations</i> | max  | mean | min  | max  | mean | min  | max  | mean | min  |
| Southern Arctic       | 1               | 1.00 | 0.00 | 1.00 | 0.00 | 0.00 | 0.00 | 0.00 | 0.00 | 0.00 |
| Taiga Plains          | 20              | 0.20 | 0.25 | 0.20 | 0.15 | 0.25 | 0.15 | 0.15 | 0.25 | 0.30 |
| Taiga Shield          | 6               | 0.00 | 0.17 | 0.17 | 0.17 | 0.17 | 0.17 | 0.17 | 0.17 | 0.00 |
| Boreal Shield         | 25              | 0.28 | 0.20 | 0.20 | 0.04 | 0.08 | 0.44 | 0.00 | 0.12 | 0.28 |
| Boreal Plains         | 157             | 0.12 | 0.04 | 0.08 | 0.05 | 0.08 | 0.18 | 0.06 | 0.02 | 0.11 |
| Prairies              | 112             | 0.29 | 0.02 | 0.16 | 0.06 | 0.13 | 0.14 | 0.08 | 0.04 | 0.07 |
| Montane<br>Cordillera | 36              | 0.03 | 0.06 | 0.08 | 0.00 | 0.06 | 0.14 | 0.00 | 0.03 | 0.08 |
| Boreal Cordillera     | 12              | 0.00 | 0.17 | 0.17 | 0.17 | 0.25 | 0.17 | 0.17 | 0.25 | 0.42 |
| Taiga Cordillera      | 3               | 0.00 | 1.00 | 0.33 | 0.00 | 1.00 | 0.00 | 0.00 | 1.00 | 0.33 |
| Hudson Plains         | 3               | 0.00 | 0.00 | 0.00 | 0.00 | 0.00 | 0.33 | 0.00 | 0.00 | 0.00 |
| <i>Decreases</i>      |                 |      |      |      |      |      |      |      |      |      |
| Southern Arctic       | 1               | 0.00 | 0.00 | 1.00 | 0.00 | 0.00 | 0.00 | 0.00 | 0.00 | 0.00 |
| Taiga Plains          | 20              | 0.20 | 0.00 | 0.10 | 0.15 | 0.25 | 0.05 | 0.15 | 0.25 | 0.10 |
| Taiga Shield          | 6               | 0.00 | 0.00 | 0.17 | 0.17 | 0.17 | 0.17 | 0.17 | 0.17 | 0.00 |
| Boreal Shield         | 25              | 0.08 | 0.00 | 0.00 | 0.04 | 0.04 | 0.20 | 0.00 | 0.12 | 0.16 |
| Boreal Plains         | 157             | 0.10 | 0.03 | 0.07 | 0.01 | 0.02 | 0.11 | 0.01 | 0.00 | 0.06 |
| Prairies              | 112             | 0.06 | 0.01 | 0.15 | 0.00 | 0.00 | 0.01 | 0.00 | 0.00 | 0.02 |
| Montane<br>Cordillera | 36              | 0.03 | 0.06 | 0.03 | 0.00 | 0.03 | 0.08 | 0.00 | 0.03 | 0.08 |
| Boreal Cordillera     | 12              | 0.00 | 0.00 | 0.00 | 0.17 | 0.25 | 0.00 | 0.17 | 0.25 | 0.00 |
| Taiga Cordillera      | 3               | 0.00 | 0.00 | 0.00 | 0.00 | 1.00 | 0.00 | 0.00 | 1.00 | 0.00 |
| Hudson Plains         | 3               | 0.00 | 0.00 | 0.00 | 0.00 | 0.00 | 0.33 | 0.00 | 0.00 | 0.00 |
| <i>Increases</i>      |                 |      |      |      |      |      |      |      |      |      |
| Southern Arctic       | 1               | 1.00 | 0.00 | 0.00 | 0.00 | 0.00 | 0.00 | 0.00 | 0.00 | 0.00 |
| Taiga Plains          | 20              | 0.00 | 0.25 | 0.10 | 0.00 | 0.00 | 0.10 | 0.00 | 0.00 | 0.20 |
| Taiga Shield          | 6               | 0.00 | 0.17 | 0.00 | 0.00 | 0.00 | 0.00 | 0.00 | 0.00 | 0.00 |
| Boreal Shield         | 25              | 0.20 | 0.20 | 0.20 | 0.00 | 0.04 | 0.24 | 0.00 | 0.00 | 0.12 |
| Boreal Plains         | 157             | 0.02 | 0.01 | 0.01 | 0.04 | 0.06 | 0.08 | 0.05 | 0.02 | 0.05 |
| Prairies              | 112             | 0.22 | 0.01 | 0.01 | 0.06 | 0.13 | 0.13 | 0.08 | 0.04 | 0.05 |
| Montane<br>Cordillera | 36              | 0.00 | 0.00 | 0.06 | 0.00 | 0.03 | 0.06 | 0.00 | 0.00 | 0.00 |

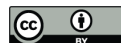

|                   |    |      |             |             |      |      |             |      |      |             |
|-------------------|----|------|-------------|-------------|------|------|-------------|------|------|-------------|
| Boreal Cordillera | 12 | 0.00 | <b>0.17</b> | <b>0.17</b> | 0.00 | 0.00 | <b>0.17</b> | 0.00 | 0.00 | <b>0.42</b> |
| Taiga Cordillera  | 3  | 0.00 | <b>1.00</b> | <b>0.33</b> | 0.00 | 0.00 | 0.00        | 0.00 | 0.00 | <b>0.33</b> |
| Hudson Plains     | 3  | 0.00 | 0.00        | 0.00        | 0.00 | 0.00 | 0.00        | 0.00 | 0.00 | 0.00        |
| <hr/>             |    |      |             |             |      |      |             |      |      |             |
| 375               |    |      |             |             |      |      |             |      |      |             |

1580



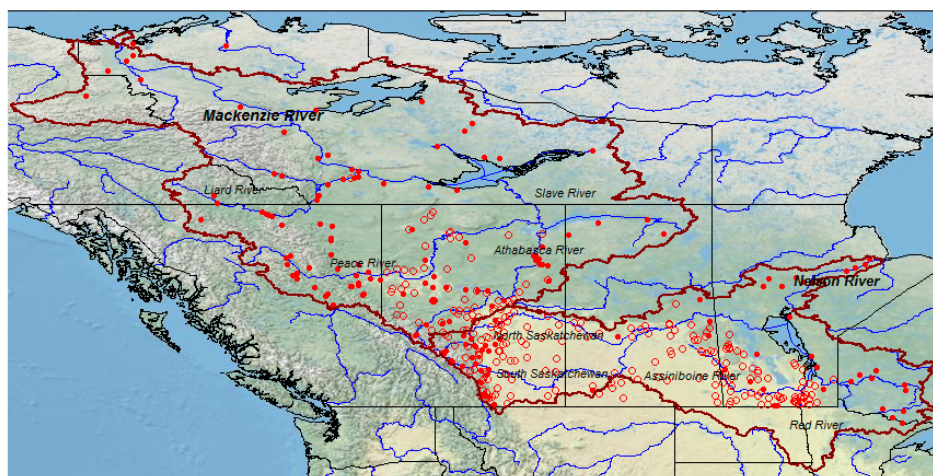

1585 Figure 1. Study Area showing the Mackenzie and Nelson River basins (darkred outline) and the location of  
 continuous stations (red dots) and seasonal stations (red circles). Basemap © OpenStreetMap contributors  
 2020. Distributed under a Creative Commons BY-SA License.



1590

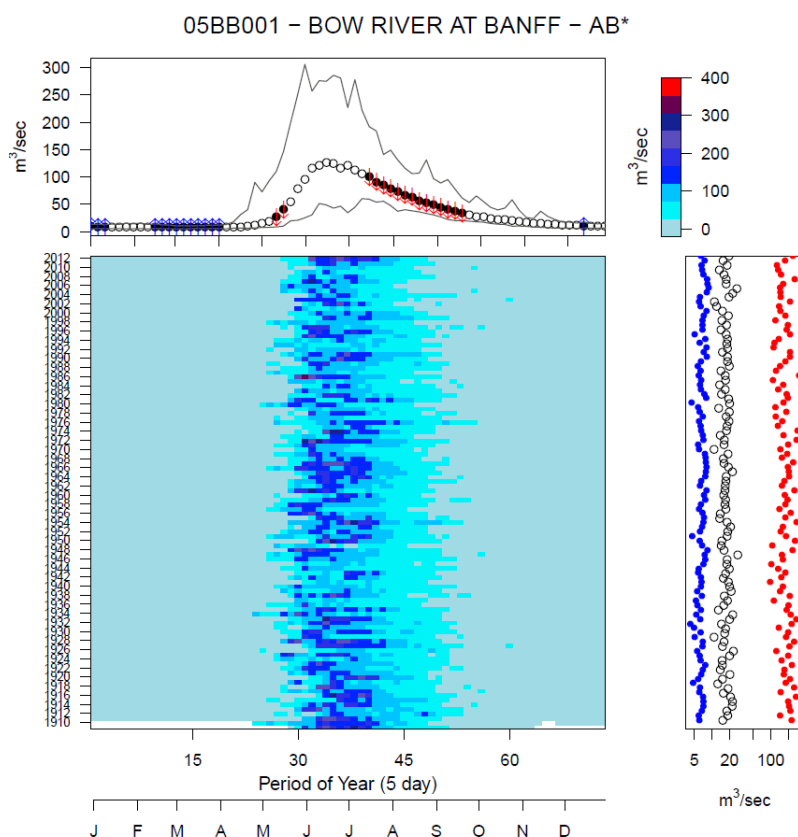

Figure 2. Plot of observed flows in the Reference Hydrologic Basin station 05BB001 Bow River at Banff, Alberta. The main panel shows the five-day periods of the year against the years of record. White space indicates missing observations and the colours represent flow magnitudes scaled according to the bar in the upper right corner. The upper panel show the maximum, median and minimum flow for each of the five-day periods and red (blue) arrows indicate statistically significant decreases (increases) using Mann-Kendall  $\tau$  at  $p \leq 0.05$ . The panel on the right shows the annual minima, median (open circle), and maxima; statistically significant decreasing (increasing) trends (Mann-Kendall  $\tau$  at  $p \leq 0.05$ ) are indicated by red (blue). Whenever the station is a member of the reference hydrologic basin network (RHBN) an \* appears at the end of the station name.

1600

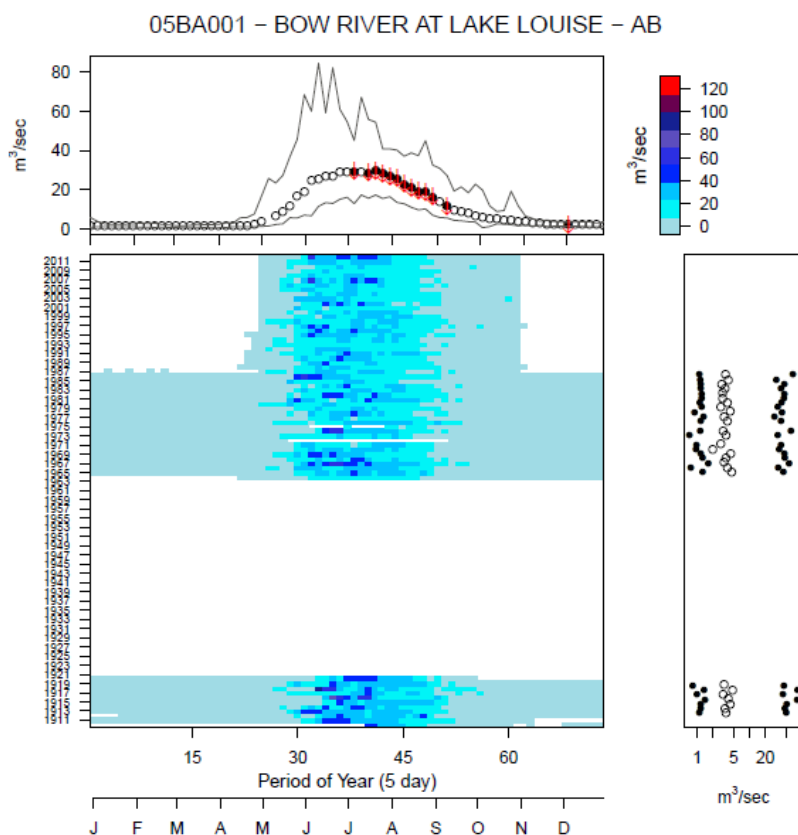

Figure 3. Plot of observed flows in the 05BA001 Bow River at Lake Louise, Alberta; a natural flow station. The main panel shows the five-day periods of the year against the years of record. White space indicates missing observations and the colours are scales according to the bar in the upper right corner. The upper panel shows the maximum, median and minimum flow for each of the five-day periods and red (blue) arrows indicate statistically significant decreases (increases) using Mann-Kendall  $\tau$  at  $p \leq 0.05$ . The panel on the right shows the annual minima, median (open circle), and maxima; statistically significant decreasing (increasing) trends (Mann-Kendall  $\tau$  at  $p \leq 0.05$ ) are indicated by red (blue).

1610

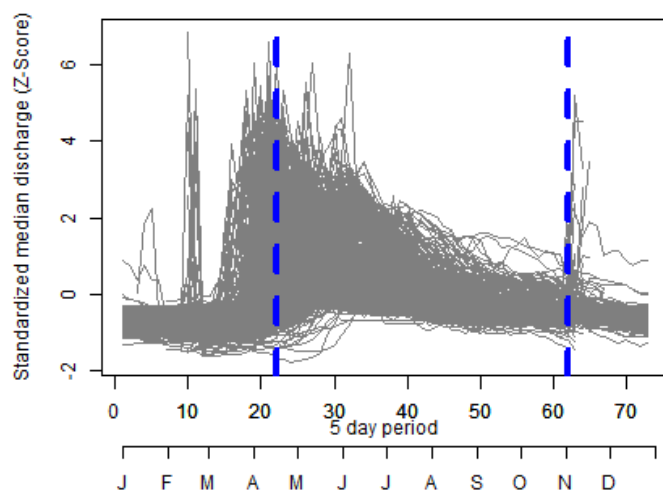

Figure 4. Standardized median streamflow for 5-day periods from the 395 hydrometric stations. The flow from each station was standardized removing the mean and dividing by the standard deviation. Only the period between 21 April and 1 November (indicated by the region between the blue dashed lines) is considered, as seasonally operated stations have no observations during winter months.

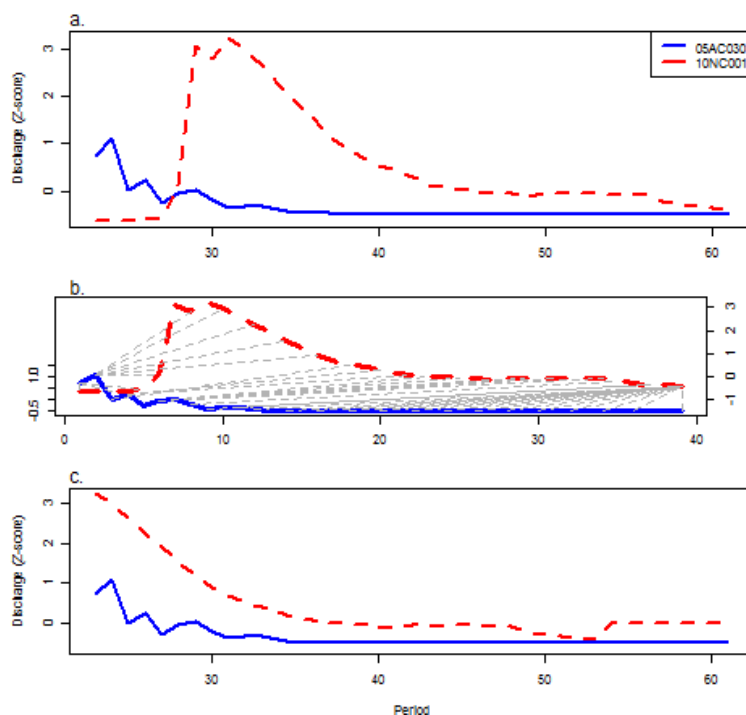

1620 Figure 5. Example of alignment of two time series using dynamic time warping [DTW] from stations 05AC030  
 Snake Creek near Vulcan AB and 10NC001 Anderson River below Carnwath River NT.

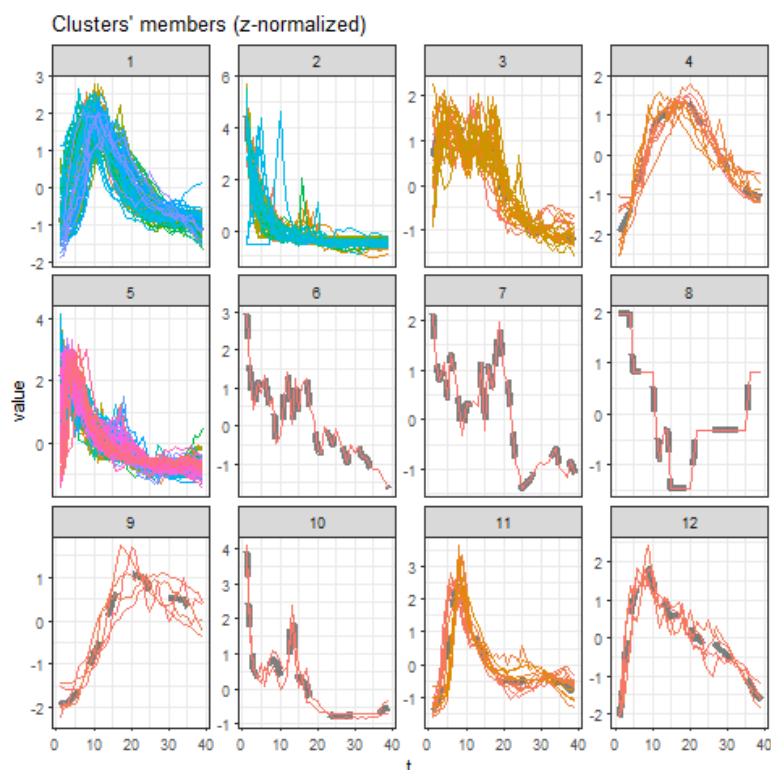

Figure 6. Streamflow Regime Types produced by clustering of the 395 standardized median five-day streamflows  
 1625 using dynamic time warping. The individual lines are coloured based on stationID, the consistency of colour  
 reflects similar spatial locations. The heavy dashed line is the centroid of the cluster. Note that the number on the  
 x axis is for the aligned series (1-39) as opposed to 23-61. The y axis value is Z-score and differs in scale between  
 the panels.

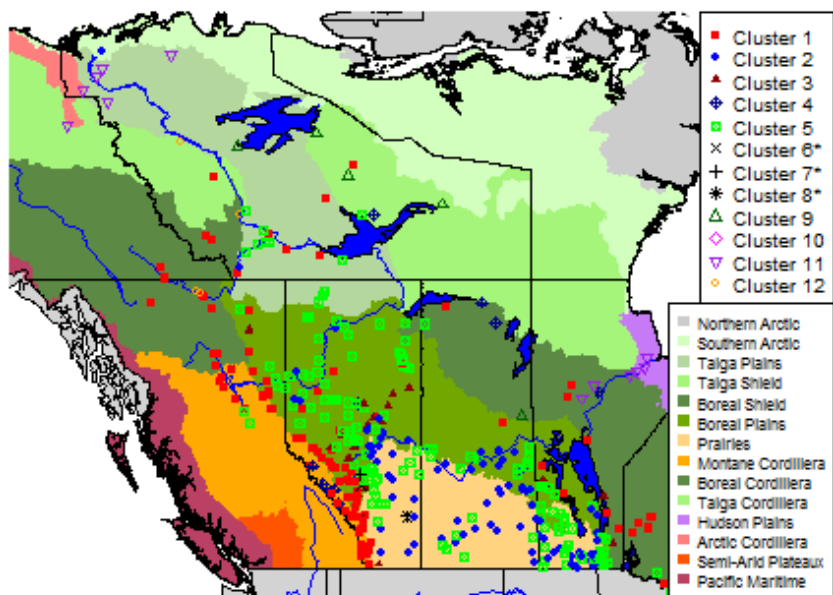

1630

Figure 7. Locations of the 12 Streamflow Regime Types from the changing cold regions domain overlain on the ecosystems of western Canada. Clusters marked with an \* have only a single member.

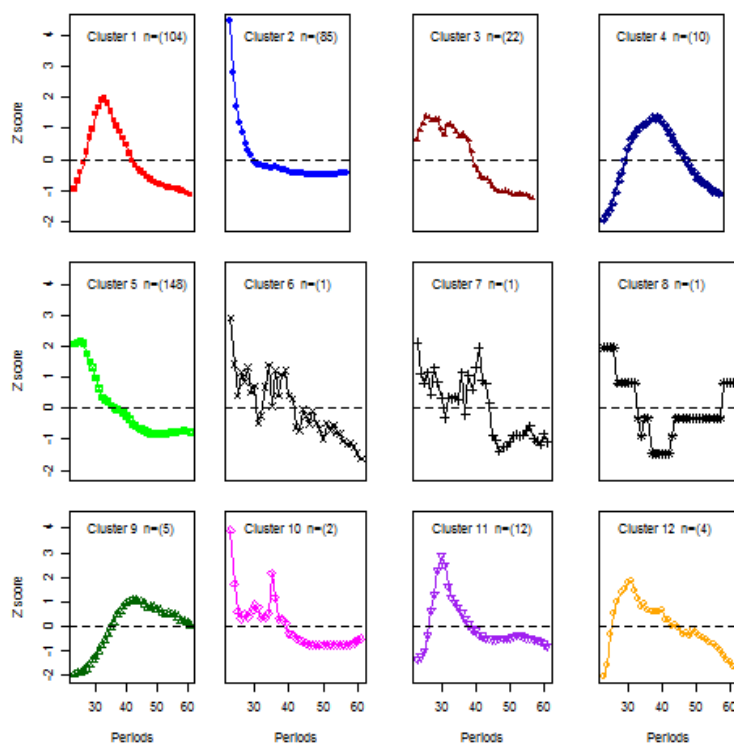

1635

Figure 8. Centroids of the 12 Streamflow Regime Type clusters.





05DA007 - MISTAYA RIVER NEAR SASKATCHEWAN CROSSING - AB\*

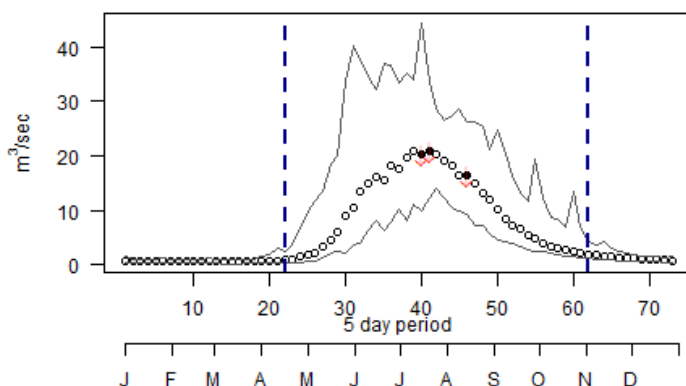

1640 Figure 9. Example of the trend portion of the summary hydrograph, the two dashed lines indicate the start and end of the common window from period 23 to period 61.

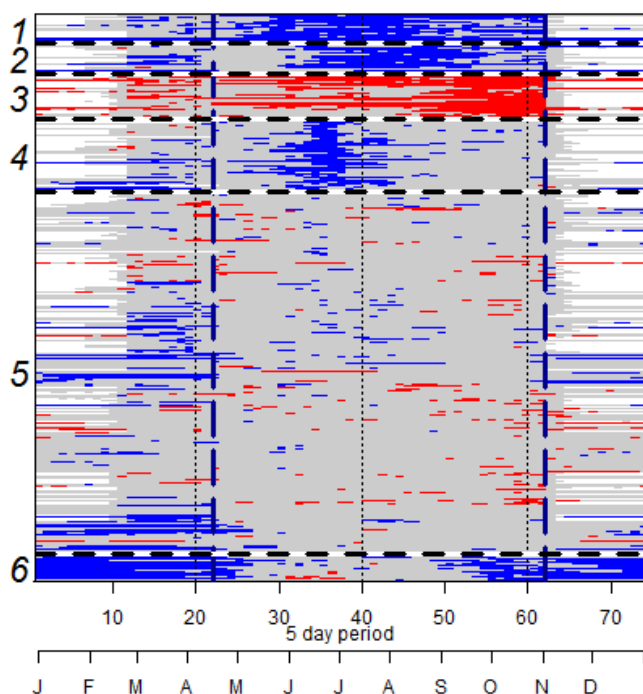

1645 Figure 10. Trend Patterns in the 395 stations, significant increases (blue) and significant decreases (red), no trend  
 (gray) and missing (white). The stations are ordered by Trends Pattern (cluster) number and stationID. Data  
 outside the dashed lines was not used in the clustering, but is shown where available (periods 1-22 and 62-73).

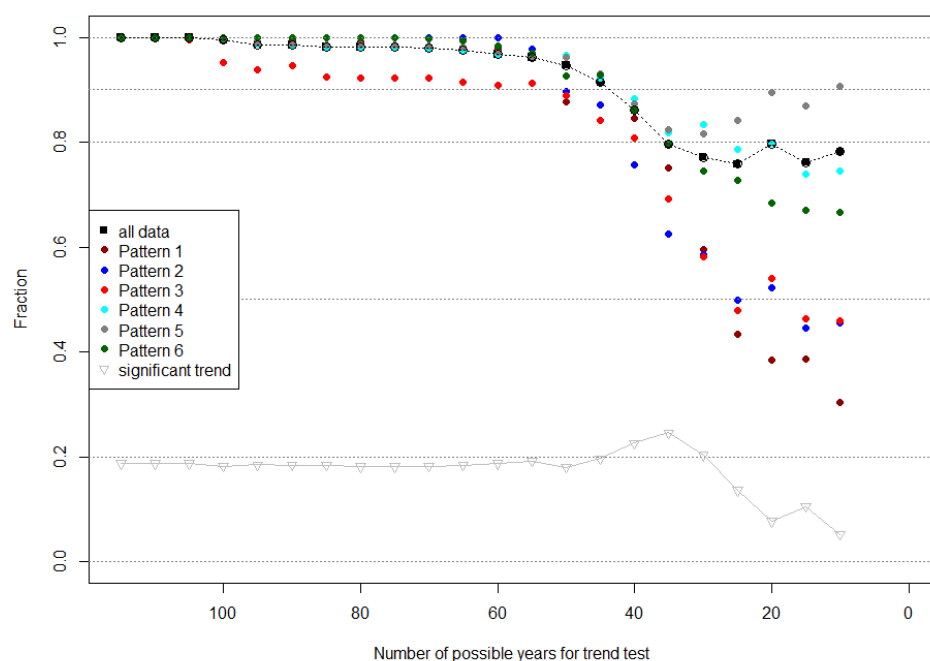

1650 Figure 11. The fraction of stations with the same trend pattern as in the original full length record, for period  
 lengths decreasing from 115 to 10 years in five-year steps. The fraction for all data is plotted as filled black  
 squares, and for each of the 6 trend patterns as filled circles [colours are as in other figures]. The fraction of  
 stations having a significant trend for each step is plotted as gray triangles. This analysis was done using 384 sites  
 of the original 395; the eleven sites omitted had less than three years' worth of observed values in the final time  
 1655 period [2005-2015].

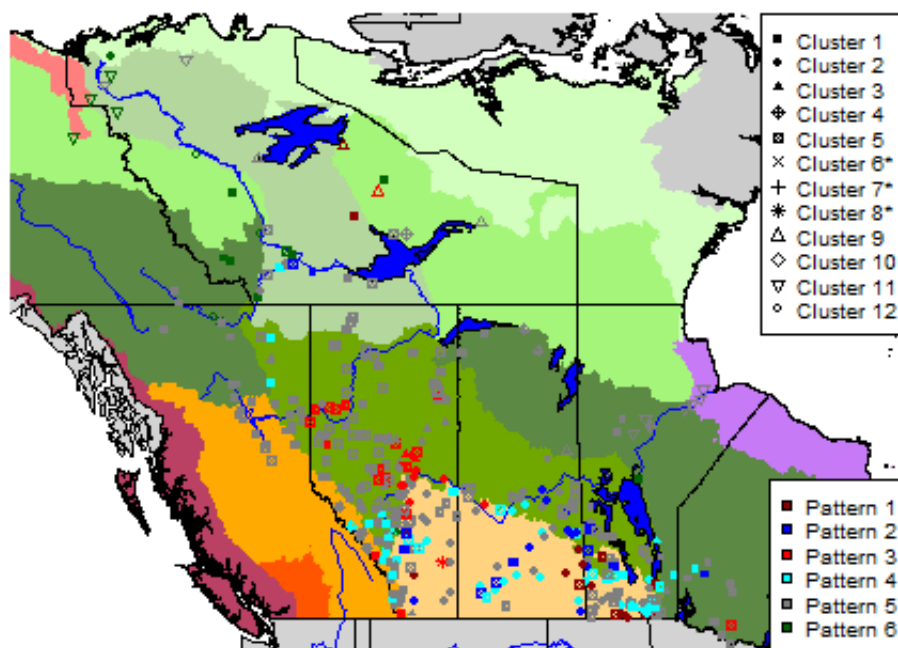

1660 Figure 12. Trend Patterns (colour) and Streamflow Regime Types (cluster # with symbols) of the 395 stations in  
 the study domain. The ecozone legend is as in Figure 7.

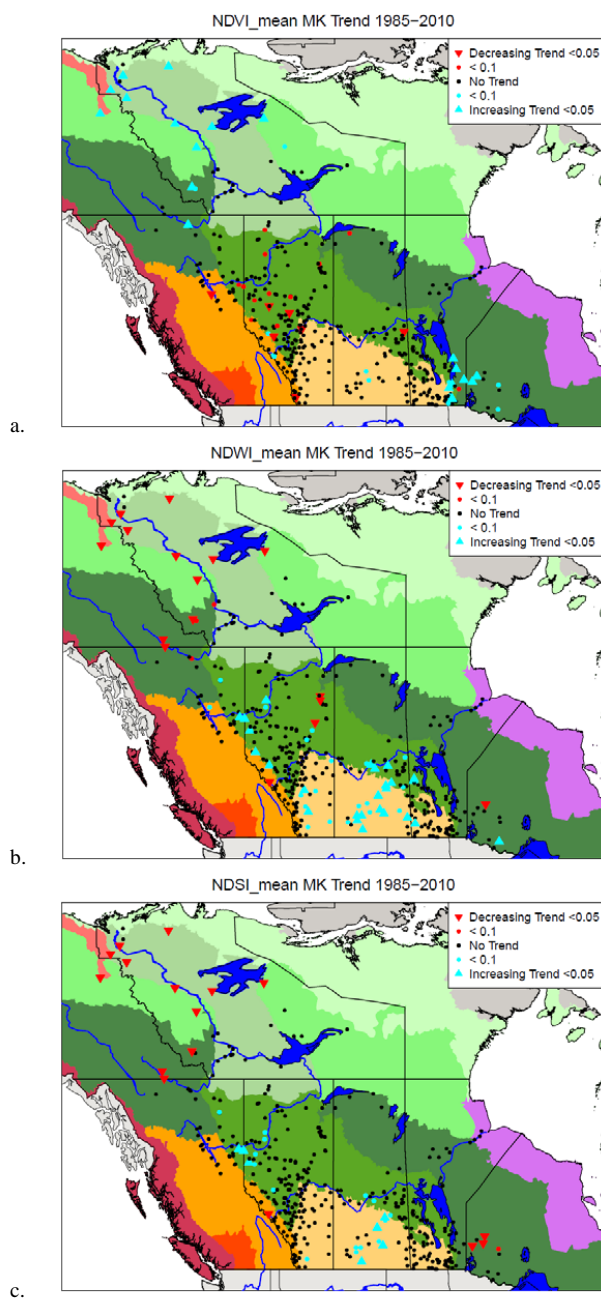

Figure 13. Trends in mean (a) NDVI, (b) NDWI, and (c) NDSI between 1985 and 2010. The ecozone legend is as in Figure 7.
